1 HIGH RESOLUTION MITOCHONDRIAL DNA ANALYSIS SHEDS LIGHT ON HUMAN  
2 DIVERSITY, CULTURAL INTERACTIONS AND POPULATION MOBILITY IN NORTHWESTERN  
3 AMAZONIA

4 Leonardo Arias<sup>1</sup>, Chiara Barbieri<sup>2</sup>, Guillermo Barreto<sup>3</sup>, Mark Stoneking<sup>1</sup>, Brigitte Pakendorf<sup>4</sup>

5 <sup>1</sup> Department of Evolutionary Genetics, Max Planck Institute for Evolutionary Anthropology, D-04103,  
6 Leipzig, Germany

7 <sup>2</sup> Department of Linguistic and Cultural Evolution, Max Planck Institute for the Science of Human  
8 History D-07745 Jena, Germany

9 <sup>3</sup> Laboratorio de Genética Molecular Humana, Universidad del Valle, Cali, Colombia,

10 <sup>4</sup> Dynamique du Langage, UMR5596, CNRS & Université Lyon 2, 69363 Lyon Cedex 07, France

11 Number of text pages: 31; number of figures: 15, number tables: 6

12 Key words: Haplogroup, South America, Language, Exogamy, Amazonia

13 Leonardo Arias, Max-Planck-Institute for Evolutionary Anthropology, Deutscher Platz 6, D-04103,  
14 Leipzig, Germany. Telephone number: +49 341 3550 505, Fax: +49 341 3550 555. E-mail:  
15 leoarias2@gmail.com

16 Grant sponsorship: Max Planck Society and COLCIENCIAS

17

18

19

20

21

22 **ABSTRACT**

23 **Objectives**

24 Northwestern Amazonia (NWA) is a center of high linguistic and cultural diversity. Several language  
25 families and linguistic isolates occur in this region, as well as different subsistence patterns: some groups  
26 are foragers while others are agriculturalists. In addition, speakers of Eastern Tukanoan languages are  
27 known for practicing linguistic exogamy, a marriage system in which partners must come from different  
28 language groups. In this study, we use high resolution mitochondrial DNA sequencing to investigate the  
29 impact of this linguistic and cultural diversity on the genetic relationships and structure of NWA groups.

30 **Methods**

31 We collected saliva samples from individuals representing 40 different NWA ethnolinguistic groups and  
32 sequenced 439 complete mitochondrial genomes to an average coverage of 1030x.

33 **Results**

34 The mtDNA data revealed that NWA populations have high genetic diversity with extensive sharing of  
35 haplotypes among groups. Moreover, groups who practice linguistic exogamy have higher mtDNA  
36 diversity, while the foraging Nukak have lower diversity. We also find that rivers play a more important  
37 role than either geography or language affiliation in structuring the genetic relationships of populations.

38 **Discussion**

39 Contrary to the view of NWA as a pristine area inhabited by small human populations living in isolation,  
40 our data support a view of high diversity and contact among different ethnolinguistic groups; movement  
41 along rivers has probably facilitated this contact. Additionally, we provide evidence for the impact of  
42 cultural practices, such as linguistic exogamy, on patterns of genetic variation. Overall, this study  
43 provides new data and insights into a remote and little-studied region of the world.

44

45

46 Northwestern Amazonia (NWA) contains tremendous biological, linguistic, and cultural diversity, which  
47 likely reflects the heterogeneity of the landscape, especially the complex and extensive network of rivers  
48 found in this area. The region (Figure 1) extends from the Andean foothills in the west to the area  
49 between the Orinoco River and the Rio Negro in the east, and extends south until the confluence between  
50 the Rio Negro and the Amazon River. The northern border is defined by the Eastern Andean Cordillera  
51 and the Colombian-Venezuelan llanos, and in the south by the full length of the Putumayo River (Eriksen  
52 2011).

53 In terms of linguistic diversity, NWA harbors ethnolinguistic groups belonging to the main South  
54 American language families accepted by specialists (Campbell 1997; Chacon 2014; Dixon and  
55 Aikhenvald 1999), namely Arawakan, Carib, Tupi, and Quechua. Additionally, several local families are  
56 also present, such as Tukanoan, Guahiban, Huitotoan, Boran, Peba-Yaguan, Piaroa-Saliban and Maku-  
57 Puinave, as well as various isolate languages like Tikuna, Cofan, and Kamentsa (Landaburu 2000).  
58 Furthermore, several indigenous groups live in voluntary isolation, and almost nothing is known about  
59 their linguistic affiliation (Franco 2002). The area has been proposed as the place of origin of the  
60 Arawakan family, since it contains the highest linguistic diversity within the family (Aikhenvald 1999;  
61 Heckenberger 2002; Zucchi 2002). In addition, all 20 languages of the Tukanoan family are found in the  
62 area; these are classified into two branches: The Western Tukanoan branch (WT) distributed along the  
63 Putumayo, Caquetá, and Napo rivers, and the Eastern Tukanoan branch (ET) along the Vaupés, Rio  
64 Negro, and Apaporis rivers and their tributaries (Chacon 2014). The language families Carib, Tupi, and  
65 Quechua are probably recent immigrants in NWA, since only one language per family is present in the  
66 area. In addition, the Tupi language Nheengatú or Lingua Geral is found in the region; however, this is a  
67 very recent introduction spread by missionaries during the 17<sup>th</sup> and 18<sup>th</sup> centuries and by traders during  
68 the rubber boom in the 19<sup>th</sup> century, when it was used as a trade language (Sorensen 1967; Stenzel 2005).  
69 [Figure 1 here]

70 In terms of cultural diversity, while NWA has often been viewed as a pristine area inhabited only by  
71 small, isolated, seminomadic tribes with an economy based on hunting and gathering (Denevan 1992;  
72 Meggers 1954), in fact there is considerable variation in subsistence and marriage practices. While some  
73 groups are traditional foragers, others engage in agriculture, and instead of isolated groups, archaeological  
74 and anthropological evidence now shows that NWA was indeed part of a continent-wide network of  
75 exchange and trade. Complex societies organized in chiefdoms and multiethnic confederations arose in  
76 the region, and multilingualism and extensive interactions among ethnolinguistic groups were the norm  
77 (Heckenberger 2002; Hornborg 2005; Santos-Granero 2002; Vidal 1997). In particular, the groups  
78 speaking Eastern Tukanoan languages and some of their Arawakan neighbors living in the basin of the  
79 Vaupés River and Rio Negro engage in an exceptional marital practice known as linguistic exogamy  
80 (Aikhenvald 1996; Chacon and Cayón 2013; Sorensen 1967; Stenzel 2005). According to this cultural  
81 norm, individuals are required to marry someone from a different language group, with each individual's  
82 linguistic affiliation determined by the language of the father. Linguistic exogamy thus creates a situation  
83 of multilingualism and movement of people (especially women, since it is accompanied by patrilocality  
84 and patrilineality) among the groups participating in the system (Sorensen 1967).

85 Historical linguistics, cultural anthropology, and archaeology are the main disciplines that have  
86 traditionally addressed questions regarding the origins, prehistory, and genetic relationships among the  
87 NWA ethnolinguistic groups (Campbell 1997; Chacon 2014; Heckenberger 2008; Lathrap 1970; Meggers  
88 1948; Nettle 1999). However, due to the scarcity of the archaeological record, the time-depth limitations  
89 of linguistic methods based on lexical cognates to establish deep relationships (Dediu and Levinson 2012;  
90 Hock and Joseph 2009), and the insufficiency of documentation and description of a large number of the  
91 NWA societies, many of these questions remain to be fully answered. The oldest archaeological evidence  
92 of human occupation in NWA comes from a single site on the middle Caquetá River dated between 9250  
93 and 8100 BP, containing a great variety of stone artifacts, carbonized seeds and other botanical remains  
94 from different palm species, as well as phytoliths of bottle gourd, leren, and pumpkin (Aceituno et al.

95 2013; Gnecco and Mora 1997), indicating that these early human groups relied on vegetable resources  
96 that are still exploited by contemporary societies in NWA.

97 One hypothesis about the peopling of NWA was proposed by Nimuendajú (1950), who suggested that the  
98 region was first inhabited by hunter-gatherer populations, perhaps the ancestors of the Maku-Puinave  
99 groups, most of whom still practice a foraging lifestyle. Proto-Arawakan groups then started expanding in  
100 the region from their place of origin located between the Orinoco river and the Rio Negro (Heckenberger  
101 2002; Lathrap 1970), and finally, the Tukanoans are assumed to have arrived in the area and displaced  
102 peoples speaking Arawakan and Maku-Puinave languages from the Vaupés (the Tukanoans probably  
103 came from the Napo-Putumayo, where Western Tukanoans still live). However, this scenario does not  
104 account for the presence of groups belonging to the Carib, Guahiban, Huitotoan, and Boran language  
105 families and the various language isolates in the region.

106 Genetic studies can provide insights into population history, and indeed studies of mitochondrial DNA  
107 (mtDNA) genetic variation in Native American populations have contributed greatly to our knowledge  
108 about the peopling of the Americas. Early studies using restriction fragment length polymorphisms  
109 (RFLP) and sequencing of the hypervariable region one (HVS-I) identified five founder lineages or  
110 haplogroups, designated as A to D and X (Bailliet et al. 1994; Barbieri et al. 2011; Gaya-Vidal et al.  
111 2011; Keyeux et al. 2002; Lewis et al. 2007; Schurr 2004; Torroni et al. 1993). Whereas haplogroups A-D  
112 are widely distributed in the Americas, haplogroup X is restricted to North America (Bolnick and Smith  
113 2003; Malhi et al. 2001). The analysis of HVS-I in several Native American populations showed that  
114 haplogroups A-D exhibit similar levels of diversity (Bonatto and Salzano 1997), supporting the  
115 hypothesis of a single origin of all Native American populations from a Northeast Asian source.  
116 Additionally, HVS-I data have been used to determine the genetic relationships among indigenous  
117 populations in South America and to test hypotheses concerning how genetic variation is structured at the  
118 regional and continental levels (Barbieri et al. 2011; Gaya-Vidal et al. 2011; Lewis et al. 2007; Marrero et  
119 al. 2007; Melton et al. 2007). These studies revealed that Andean (or western) populations show higher

120 levels of diversity and low genetic distances in contrast to the Eastern populations, who show the opposite  
121 pattern. However, in previous studies NWA populations have been generally underrepresented, and hence  
122 the inferences about the genetic structure of the entire Amazonian region are based on a small number of  
123 populations.

124 Recent developments in sequencing technology allow the determination of complete mtDNA genomes at  
125 the population level and thus enable unbiased insights into the maternal history of human populations  
126 (Delfin et al. 2014; Gunnarsdottir et al. 2011; Kivisild 2015). At present, no such studies are reported for  
127 South American indigenous populations. Available studies of complete mtDNA genomes from Native  
128 Americans have been restricted to a limited number of individuals carrying particular haplogroups,  
129 usually selected based on their HVS-I sequences (Achilli et al. 2013; Bodner et al. 2012; de Saint Pierre et  
130 al. 2012; Fagundes et al. 2008; Lee and Merriwether 2015; Perego et al. 2009; Perego et al. 2010), or to  
131 archaeological remains from different time periods (Fehren-Schmitz et al. 2015; Llamas et al. 2016).

132 These studies have primarily focused on inferences about the peopling of the continent, the number of  
133 migrations, the divergence times, and changes in the effective population size through time. Nevertheless,  
134 several problems and biases are associated with this sampling strategy. First, the overall diversity might  
135 be underestimated, since individuals carrying the same HVS-I sequence can exhibit considerable variation  
136 in the coding region (Gunnarsdottir et al. 2011). Secondly, the reconstruction of demographic trends can  
137 be skewed, since the estimation of effective population sizes through time using Bayesian coalescent  
138 methods (i.e. Bayesian skyline plots in BEAST) can generate spurious signals of population growth when  
139 based on samples selected by haplogroup (Gunnarsdottir et al. 2011). Lastly, the histories and origins of  
140 specific populations cannot be investigated, since the coalescent age of a particular lineage does not  
141 correspond to the age of the population, especially when the diversity within each lineage is unknown  
142 (Schurr 2004). In this study, we use complete mtDNA sequencing in a large and representative sample of  
143 populations covering the extant ethnolinguistic diversity from NWA to reconstruct their maternal history,  
144 as well as to determine their genetic diversity and to make inferences about the origins of this diversity.

145 Finally, we aim to investigate the impact of prehistoric population dynamics and cultural interactions on  
146 the structure of the genetic variation observed among present-day NWA populations.

147

## 148 **MATERIALS AND METHODS**

### 149 **Sample collection**

150 Samples from unrelated individuals belonging to 40 ethnolinguistic groups were collected during several  
151 expeditions carried out by one of the authors (L.A.) in five departments (administrative divisions) of  
152 NWA, namely: Amazonas, Guainía, Guaviare, Meta and Putumayo (Table 1, Figure 1). The samples  
153 consisted of either saliva, collected as 3 mL of saliva in 3 mL of lysis buffer (Quinque et al. 2006), or  
154 blood samples stabilized with EDTA. Written informed consent was obtained from each participant, and  
155 from the community leader and/or local/regional indigenous organizations, after giving a full description  
156 of the aims of the study. Local translators and fieldwork assistants helped to explain and translate into the  
157 local languages when individuals or communities were not proficient in Spanish. Additionally, each  
158 participant answered a short questionnaire soliciting information regarding their birthplace, language,  
159 ethnic affiliation and that of their parents and grandparents. The study was approved by the ethics  
160 committee of the Universidad del Valle in Cali, Colombia and the Ethics Commission of the University of  
161 Leipzig Medical Faculty. All procedures were undertaken in accordance with the Declaration of Helsinki  
162 on ethical principles and an export permit was issued by the Colombian Ministry of Health and Social  
163 Protection.

164 [Table 1 here]

### 165 **DNA sequencing and sequence processing**

166 The DNA was extracted from blood samples with the “salting out” method (Miller et al. 1988) and from  
167 the saliva samples with the QIAamp DNA Midi kit (Qiagen), starting from 2.0 mL of the saliva/buffer

168 mixture. The concentration of DNA was quantified with the NanoDrop 8000 spectrophotometer (Thermo  
169 Scientific). We prepared genomic libraries with double indices and enriched for full mtDNA genomes  
170 using a hybridization-capture method described previously (Kircher et al. 2012; Maricic et al. 2010).  
171 From the enriched libraries, paired-end sequences of 100 bp length were generated on the Illumina HiSeq  
172 2500 platform. Base-calling was performed using freeIbis (Renaud et al. 2013), and Illumina adapters  
173 were trimmed and completely overlapping paired sequences were merged using leeHOM (Renaud et al.  
174 2014a). The sequencing data were de-multiplexed using deML (Renaud et al. 2014b) and the sequences  
175 aligned against the human reference genome 19 using BWA's *aln* algorithm (Li and Durbin 2009). After  
176 duplicate removal using PicardTools v2.1.1 (<https://github.com/broadinstitute/picard>), we performed an  
177 iterative alignment for each library individually to obtain mtDNA consensus sequences. In the first step,  
178 we extracted all sequencing reads of a library that aligned either to the mitochondrial genome or to a list  
179 of nuclear copies of mtDNA (NUMTs) (Li et al. 2012). We subsequently aligned these reads to the  
180 revised Cambridge Reference Sequence (rCRS; Andrews et al. 1999) using BowTie2's *very-sensitive*  
181 algorithm (Langmead and Salzberg 2012) and called a consensus sequence. In the second step, the reads  
182 were re-aligned to the library's respective consensus sequence generated in the first step, using the same  
183 BowTie2 settings. After the second alignment step, we called a final consensus sequence that was used  
184 throughout the rest of the analysis. Final sequences in fasta format were aligned to the Revised  
185 Cambridge Reference Sequence (rCRS (Andrews et al. 1999)) with the multiple sequence alignment  
186 software Mafft (Katoh and Standley 2013), and manually inspected for alignment errors with Bioedit ver.  
187 7.2.5 (Hall 1999). The two poly-C regions (np 303–315 and 16,183–16,194) were excluded from the  
188 subsequent analysis; although one position (16,189) diagnostic for haplogroup B2 is therefore not  
189 considered in the haplogroup-calling analysis, the additional substitutions defining this haplogroup that  
190 occur elsewhere in the mitochondrial genome enable unambiguous assignment of sequences to lineage  
191 B2.

192



## 193 **Data analysis**

194 We considered populations with a sample size of 10 individuals or more, and merged populations with  
195 sample sizes smaller than 10 based on linguistic criteria when our initial analyses did not show significant  
196 genetic differences, as follows (Table 1). The Arawakan groups Achagua (n=6) and Piapoco (n=18) were  
197 merged into a single population, since their indigenous reservations are adjacent and individuals often  
198 intermarry (data available on request); one Bare (n=1) individual was added to the Curripaco (n=16)  
199 sample among whom he was living when sampled on the Atabapo River; Yucuna (n=31) and Matapi  
200 (n=8) were merged into a single population, since they both speak Yucuna, live along the same river, and  
201 intermarry (data available on request); and Murui (n=18) and Uitoto (n=8) were merged, as these two  
202 groups belong to the same language family, which is composed of several dialects that are mutually  
203 intelligible (<http://glottolog.org/resource/languoid/id/huit1251>, accessed on 31.05.2017). Finally,  
204 following the latest classification of the Tukanoan family (Chacon 2014), the Eastern Tukanoan groups  
205 Piratapuyo (n=8) and Wanano (n=5) were merged as Pira-Wanano; Tukano (n=8) and Tatuyo (n=2) were  
206 merged as Tuka-Tatuyo; and Tuyuca (n=7), Yuruti (n=1), Pisamira (n=1), and Karapana (n=1) were  
207 merged as Other-ET. The only group with a sample size smaller than 10 that we retained as a separate  
208 group in the analyses were the Carijona (n=8), since this is the only Carib-speaking group living in NWA.  
209 Moreover, they are at risk of disappearing both physically and culturally, with less than 30 active speakers  
210 of Carijona scattered in two communities, and they occupy an important place in the ethno-history of the  
211 region (Franco 2002). We excluded Barasano (n=4), Kubeo (n=5), Cofan (n=6), Cabiari (n=1),  
212 Guambiano (n=1), and Nasa (n=1) from all the analyses except the haplotype networks, since this analysis  
213 represents the evolutionary relationships among individual sequences. We furthermore excluded nine  
214 individuals with maternal ancestry outside of NWA (labeled 'Mestizo' in Table 1) from all analyses.  
215 After merging and filtering as described above, 412 sequences from 24 groups were kept in the  
216 population-based analyses.

217 Based on information from D-PLACE (Kirby et al. 2016) and HG database  
218 (<https://huntergatherer.la.utexas.edu/home>, accessed on 06.06.2017), we divided the populations into  
219 agriculturalists (AG) and hunter-gatherers (HGP). In the latter category we included the Nukak, who  
220 currently still practice a foraging way of life, as well as the Puinave, Sikuani, and Guayabero, who have  
221 all adopted agriculture only recently (Kondo 2002; Uribe Tobón and Instituto Colombiano de Cultura  
222 1992).

223 The haplogroup affiliation of the individual sequences was determined with Haplogrep (Kloss-  
224 Brandstatter et al. 2011), based on Phylotree build 16 (van Oven and Kayser 2009). Haplogroup  
225 frequencies by population were estimated by simple counting, and a correspondence analysis (CA) based  
226 on the frequency of sub-haplogroups (e.g. A2a) was performed and visualized with the R-packages  
227 FactoMineR (Le et al. 2008) and factoextra (Kassambara and Mundt 2016), respectively.

228 Population-based statistical analyses were performed with Arlequin v3.5 (Excoffier and Lischer 2010);  
229 these include the analysis of molecular variance (AMOVA), estimation of molecular diversity indices, the  
230 estimation of pairwise genetic distances based on  $\Phi_{ST}$ , and Tajima's D test of selective neutrality. A  
231 Multidimensional Scaling analysis (MDS) was performed on the matrix of pairwise  $\Phi_{ST}$  values to  
232 visualize the distances between populations. Additionally, we performed a Mantel test to evaluate the  
233 correlations between genetic distances and geographic distances. The matrix of geographic distances was  
234 built using the geographic coordinates of the location where the majority of samples for each  
235 ethnolinguistic group were collected and then calculating the great circle distances between locations via  
236 the R packages ade4 and geosphere (Dray and Dufour 2007; Hijmans 2016). Furthermore, a multiple  
237 regression analysis on distance matrices (MRM) (Goslee and Urban 2007) with the form:  
238  $MRM(as.dist(gen.dist) \sim as.dist(geo.dist) + as.dist(rivers.dist))$  was performed; the analysis takes into  
239 consideration a matrix of geographic distances and a matrix of proximity along rivers as predictor  
240 variables of the genetic distances (pairwise  $\Phi_{ST}$  values) between populations (Pugach et al. 2016;  
241 Yunusbayev et al. 2012). For the matrix of river distances a value of zero was given to populations living

242 along the same river or on rivers that are closely connected, and a value of one was given to populations  
243 living on different rivers.

244 The sharing of haplotypes between populations was estimated with in-house R scripts as the proportion of  
245 pairs of identical sequences shared between populations. Additionally, networks of haplotypes were  
246 constructed with the software Network ver. 4.6.1.3 and visualized with Network Publisher ver. 2.0.0.1  
247 (<http://www.fluxus-engineering.com>). Finally, Bayesian skyline plots (BSP) were constructed with  
248 BEAST ver. 1.8.2 (Drummond et al. 2012). For this analysis, the best substitution model was estimated  
249 with jModeltest 2.1.7 (Darriba et al. 2012), and BEAST was used to estimate whether a strict or a relaxed  
250 clock model best fits the data. This analysis was performed on both the complete sequences and the  
251 sequences partitioned into coding (577-16023) and non-coding (16024-576) regions, applying the  
252 corresponding substitution rates reported previously (Soares et al. 2009).

253

## 254 **RESULTS**

255 We generated 439 complete mitochondrial sequences to an average coverage per sample of 1030x, which  
256 were deposited in GenBank with accession numbers: XXXXXXXXX-XXXXXXX and XXXXXXXX-  
257 XXXXXXXX. All sequences belonged to one of the main Native American haplogroups, namely A2, B2,  
258 C1 and D1. Haplogroups A2 and C1 were the most frequent lineages in the NWA populations (excluding  
259 the so-called ‘Mestizos’), with more than half of all sequences belonging to A2 (90 haplotypes in 138  
260 sequences) and C1 (95 haplotypes in 181 sequences) together; in contrast, B2 (49 haplotypes in 73  
261 sequences) and D1 (32 haplotypes in 38 sequences) were less frequent. Table 2 provides a breakdown of  
262 the haplogroup frequencies for the ethnolinguistic groups included in the population analyses.

263 [Table 2 here]

264 A Correspondence Analysis (CA) (Figure 2) shows the clustering of populations based on the frequency  
265 of sub-haplogroups. We observed differences among populations without a clear clustering by language

266 family, with the exception of the Eastern Tukanoan groups Siriano, Desano, Pira-Wanano, Tuka-Tatuyo  
267 and Other-ET, which were near one another in the left side of the plot. However, Tanimuka, who also  
268 speak an Eastern Tukanoan language, were far apart from their linguistic relatives. Additionally,  
269 Guayabero and Sikuaní (who speak languages belonging to the Guahiban family) were located close to  
270 each other in the lower left pane of the plot. In addition to language affiliation, a few cases of proximity in  
271 the CA plot could be attributed to geographic proximity, as in the case of Kamentsá, Pasto and Inga, who  
272 all live close to one another in the Andean foothills. In other cases, the relatively close proximity of  
273 populations could be attributed to their being settled along the same river or on rivers that are part of the  
274 same basin (Supporting information Figure S1), as in the case of Curripaco and Puinave, who live on the  
275 Inírida and Atabapo rivers.

276 [Figure 2 here]

### 277 **Molecular diversity indices**

278 The genetic variation in these communities was assessed through different molecular diversity indices  
279 (Figure 3, Supporting information Table S1). On average, the gene diversity in these groups was high  
280 (0.9), but there were differences amongst them. For example, Eastern Tukanoan groups showed  
281 consistently high values of gene diversity, with the exception of the Tanimuka, who had one of the lowest  
282 values (0.73). The Western Tukanoan groups Coreguaje (0.92) and Siona (0.82) showed lower values  
283 than Eastern Tukanoan groups. Among Arawakans, the Ach-Piapoco had the lowest value (0.77). The  
284 hunter-gatherer group Nukak showed the lowest gene diversity of all groups (0.64): only four haplotypes  
285 were observed among the 16 individuals analyzed. Additionally, we observed that agriculturalist groups  
286 tended to have higher gene diversities (average = 0.92) than hunter-gatherer groups (average = 0.80)  
287 (Mann-Whitney U test, P-value = 0.03).

288 [Figure 3 here]

289 The mean number of pairwise differences (MPD) per population showed less variation, with an average  
290 of 41.07 +/- 17.86 differences. The smallest values were found in Sikurangi (24.08 +/- 11.18) and Nukak  
291 (31.07 +/- 14.33), and the largest values were observed in Cocama (44.64 +/- 20.37), Carijona (42.71 +/-  
292 20.8), and Siriano (41.38 +/- 19.66) The D values of Tajima's test of neutrality (Tajima 1989) ranged  
293 from -0.735 to 2.318. Under neutrality, Tajima's D is expected to be equal to zero and significant  
294 departures are interpreted as a result of selection or changes in population size. Although none of the D  
295 values were significant (all P-values > 0.2), positive D values >1.2 were obtained for Guayabero, Nukak,  
296 Sikurangi and Tanimuka, which may reflect recent reductions in the size of these populations. This  
297 hypothesis was supported both by the distribution of pairwise differences by population (Supporting  
298 information Figure S2), which showed increased frequencies for the category of small differences (0 and  
299 1 differences) and for the category of large differences (50 or more), as well as by the Bayesian  
300 reconstruction of population size changes through time (BSP plots, Supporting information Figure S3 and  
301 below). Furthermore, the Tanimuka and Nukak had the lowest gene diversity values.

302

### 303 **Shared haplotypes**

304 A total of 216 different haplotypes were observed among the 412 sequences included in this analysis,  
305 pointing to a considerable number of shared sequences. Of these, 146 were unique haplotypes and 70  
306 haplotypes were shared among 266 sequences: 52 within populations, 31 between populations, and 13  
307 both within and between populations. The shared haplotypes accounted for 64.6% of all the sequences  
308 analyzed. This amount of haplotype sharing between populations is considerably high when compared to  
309 other population-based studies of complete mitochondrial genomes (Table 3). In other studies, the  
310 majority of shared haplotypes were generally observed within populations, with the exception of two  
311 African datasets from Burkina Faso and Zambia (Barbieri et al. 2013; Barbieri et al. 2012), which showed  
312 low levels of sharing both within and between populations. The highest level of sharing between  
313 populations was observed for Siberian populations spread over a large geographic area (Duggan et al.

314 2013); the NWA populations analyzed in this study showed the second highest value of sharing between  
315 populations.

316 [Table 3 here]

317 Figure 4 shows the proportion of pairs of sequences shared between and within NWA populations.  
318 Siriano, Other-ET, and Pasto were the only groups without shared haplotypes within the populations. The  
319 majority of between-group haplotype sharing involved Arawakan and Eastern Tukanoan groups. The  
320 Arawakan groups share mostly with groups living in close proximity (Figure S4), e.g. Yucu-Matapi  
321 shared with Tanimuka; Curripaco with Puinave and Nukak, and Ach-Piapoco with Saliba and with the  
322 Guahiban groups Sikuani and Guayabero. In contrast, most Eastern Tukanoan groups, who practice  
323 linguistic exogamy, shared haplotypes among each other (except for Tanimuka, who shared only with  
324 Yucu-Matapi). In contrast, the Western Tukanoan groups Siona and Coreguaje shared primarily within  
325 their populations and did not share haplotypes with the Eastern Tukanoan groups.

326 The groups from the Andean foothills--Inga, Kamentsa, and Pasto--showed different patterns of shared  
327 haplotypes, despite the fact that they live in close geographic proximity. The Pasto, a group that has lost  
328 its native language and that is highly incorporated into the admixed local population, shared no  
329 haplotypes with any population. The Kamentsa shared haplotypes only with the Inga, while the Inga also  
330 shared haplotypes with three other groups located further inside the Amazonian area: Carijona, Coreguaje  
331 and Mur-Uitoto. Finally, of the three groups living on the banks of the Amazon River close to the town of  
332 Leticia, the Cocama shared with both the Yagua and Tikuna, whereas the latter two groups lacked  
333 common haplotypes.

334 [Figure 4 here]

### 335 **Haplotype networks**

336 The networks of haplotypes (Supporting information Figure S5 A-D) complement the patterns of  
337 sequence sharing, but in addition allow us to discern clusters of related (not just identical) haplotypes. We

338 observed that some of these clusters were common among different language families and others were  
339 restricted to specific language families or to groups living in close geographic proximity; these are  
340 highlighted in Figures S5 (A-D). For instance, Arawakan and Eastern Tukanoan groups exhibited several  
341 haplotypes within haplogroups A2 (Cluster I, Figure S5A), B2 (Cluster I and II, Figure S5B), and C1  
342 (Cluster III, IV, V and VI, Figure S5C) that were either shared or separated by only a few mutational  
343 steps. Notably, several of these clusters also included individuals speaking Maku-Puinave languages (cf.  
344 Cluster I and II, Figure S5B, and Cluster III, IV, and V, Figure S5C). Clusters of haplotypes restricted to  
345 specific groups are represented by clusters I and II in Figure S5D, exclusive to Eastern Tukanoan and  
346 Huitotoan populations, respectively. Furthermore, the haplotypes of the Inga (Quechuan) and the  
347 Kamentsa, who live in close proximity in the Andean foothills, were either shared between them or  
348 closely related (e.g. cluster II in Figure S5C). Finally, the haplotypes of the Guayabero and Sikuani  
349 (Guahiban) were mostly differentiated from those of other populations and generally shared by several  
350 individuals within the family (clusters II and III, Figure S5A; cluster I, Figure S5C). The sequences  
351 belonging to cluster I in haplogroup C (cluster I, Figure S5C) lack the diagnostic mutation A13263G for  
352 haplogroup C, but contain other diagnostic mutations that allow unambiguous assignment to haplogroup  
353 C. MtDNAs with this variant were previously identified in eastern Colombia by RFLP typing (Torres et  
354 al. 2006), where they occurred at high frequency in Guahibo, Piapoco, and Saliba groups. Given their  
355 high frequencies in the Guahiban groups, these haplotypes appear to belong to an autochthonous lineage  
356 that has then diffused into other groups living in the Orinoco basin.

357

### 358 **Genetic structure and genetic distances**

359 The AMOVA analysis (Table 4) allows us to test different hypotheses concerning how genetic variation  
360 is structured in NWA. We defined groups *a priori* based on language affiliation, geographic proximity,  
361 and distribution along major rivers or their tributaries to evaluate how much of the observed variation is  
362 explained by each grouping strategy. We observed that of the three grouping strategies, grouping

363 populations by their distribution along rivers resulted in the largest among-group component of the  
364 genetic variance. In contrast, language was a poor predictor of the genetic structure, showing negative and  
365 nonsignificant values for the component of variance due to differences among groups, indicating larger  
366 genetic differences among groups of populations speaking related languages than among linguistically  
367 different groups. Finally, geographic proximity was also a poor predictor; although the among-group  
368 component was larger than for language, it was not significantly different from zero. An important aspect  
369 to note is that although grouping by rivers performed better than grouping by geography or language, it  
370 still did not provide a very good description of the genetic structure, since the percentage of variance due  
371 to differences among populations within groups was still higher than the among groups component,  
372 suggesting the existence of other levels of substructure within populations.

373 [Table 4 here]

374 The matrix of genetic distances between populations based on pairwise  $\Phi_{ST}$  values (Supporting  
375 information Figure S6) was used to construct an MDS plot (Figure 5). The populations do not form any  
376 clear clustering: the majority of populations are grouped together in the center of the plot (indicated by  
377 the inner circle in Figure 5) with an average pairwise  $\Phi_{ST} = 0.03$ , while around the main cluster a second  
378 group of populations showed higher differentiation (external circle, average  $\Phi_{ST} = 0.07$ ). Finally, Sikuani,  
379 Siona, and the hunter-gatherer Nukak appeared as outliers with high genetic differentiation (average  $\Phi_{ST}$   
380 = 0.22). This picture did not change after adding an additional dimension to the MDS plot (Supporting  
381 information Figure S7). Particularly striking were the small genetic distances between the Eastern  
382 Tukanoan groups, who clustered together in the center of the MDS plot. Although Tanimuka appeared  
383 more distant from the main cluster of Eastern Tukanoan groups, their pairwise  $\Phi_{ST}$  values were not  
384 significantly different (Supporting information Figure S6) and the average  $\Phi_{ST}$  (0.02) indicated low  
385 genetic differentiation among all Eastern Tukanoan groups. In contrast, the Coreguaje and the Siona, who  
386 speak languages of the Western Tukanoan branch, showed larger genetic distances, both with the Eastern  
387 Tukanoan groups and with each other. Populations from each of the other language families did not form



388 clusters with their linguistic relatives. For example, Arawakan groups occupied different positions in the  
389 plot and their  $\Phi_{ST}$  values were significantly different.

390 [Figure 5 here]

391 The results of the Mantel test showed a lack of significant correlation between geographic distances,  
392 estimated as great-circle distances, and the matrix of pairwise  $\Phi_{ST}$  values ( $r = 0.07$ ,  $p$ -value = 0.28).  
393 However, since rivers emerged as an important factor explaining the structure of genetic variation in the  
394 AMOVA results (Table 4), we also performed a multiple regression analysis on distance matrices  
395 (MRM), where we added rivers as an additional predictor variable. Adding rivers to the regression model  
396 resulted in an increase in the amount of variation explained by the model (Table 5), with rivers being a  
397 significant predictor ( $p$ -value = 0.01). We then jack-knifed over populations (Pugach et al. 2016;  
398 Ramachandran et al. 2005) and identified three populations as outliers: Sikuani, Siona, and Nukak, who  
399 appeared as outliers in the MDS plot as well (Figure 5). We performed the multiple regression analysis  
400 excluding the outliers; this resulted in an increase of 3.4 % in the R square value, a better correlation  
401 between genetic and geographic distances, and geography becoming a significant predictor factor ( $p$ -  
402 value < 0.05) (Table 5, supporting information Figure S8), although rivers were no longer a significant  
403 predictor of genetic subdivision.

404 [Table 5 here]

#### 405 **Bayesian demographic reconstruction**

406 Bayesian skyline plots (BSP) were generated by haplogroup (A2, B2, C1 and D1) and by population. All  
407 four haplogroups showed an increase in effective population size between 17,500 – 25,000 years before  
408 present. This signal was more evident for haplogroups A2 and C1, which have the highest number of  
409 sequences (Supporting information Figure S9). In contrast, the BSP plots by population showed different  
410 outcomes. We observed four main trajectories (Supporting information Figure S3): first, a signal of  
411 population size increase shown by Yucu-Matapi, Curripaco, Desano, Siriano, Inga, Pasto, Mur-Uitoto,

412 Tikuna, and Cocama (exemplified by Yucu-Matapi in Figure S3A); second, population stability through  
413 time shown by Ach-Piapoco, Tanimuka, Coreguaje, Siona, Kamentsa, Puinave, and Yagua (exemplified  
414 by Coreguaje in Figure S3B); and third, population contraction shown by Sikuani, Guayabero, and Nukak  
415 (exemplified by Nukak in Figure S3C), which is particularly striking for Sikuani (Supporting information  
416 Figure S3D). These differences in the effective population size through time suggest that these  
417 populations have followed independent demographic histories.

418

## 419 **DISCUSSION**

420 We have investigated the genetic diversity of ethnolinguistic groups from NWA at the level of complete  
421 mitochondrial genomes. This area is underrepresented in previous studies, and our data contribute to fill a  
422 gap in our knowledge about the genetic diversity of modern human populations. We have found that  
423 NWA harbors a considerable amount of genetic diversity, with evidence for contact among different  
424 ethnolinguistic groups, contrary to the common picture of Amazonian populations as small and isolated  
425 with low genetic diversity (Fuselli et al. 2003; Wang et al. 2007). NWA populations show values of  
426 nucleotide diversity as high as or higher than those observed in most other non-African populations  
427 (Supporting information Figure S10), and they display the second-highest amount of sequence sharing in  
428 a world-wide comparison (Table 3). The complete mitochondrial genome is the maximum level of  
429 resolution one can achieve to differentiate individuals and populations at the maternal level, so the  
430 presence of identical sequences among populations living in distant geographic areas indicates recent  
431 contact and/or common ancestry.

432

### 433 **Lack of genetic structure along linguistic lines**

434 Although our dataset includes populations speaking languages belonging to different language families,  
435 we found that linguistic affiliation is a poor predictor of genetic structure, as shown by the AMOVA

436 analysis (Table 4) and by the Correspondence Analysis based on sub-haplogroup frequencies (Figure 2).  
437 This indicates that language does not constitute a barrier to gene flow, and that groups have been  
438 interacting with other neighboring groups, especially along rivers, which in our analyses performed better  
439 in explaining the patterns of genetic diversity. Archaeological and linguistic evidence demonstrates that  
440 NWA has been an area of intense contact and movement of peoples of different cultural traditions,  
441 evidenced by the diffusion of ceramic styles (Heckenberger 2002; Lathrap 1970; Zucchi 2002) and shared  
442 subsistence strategies, by the existence of language areas and contact-induced linguistic change  
443 (Aikhenvald 1999), and the generalized multilingualism among groups (Sorensen 1967; Stenzel 2005).  
444 Likewise, cultural anthropology provides additional evidence of contact among groups. For example, both  
445 Arawakans and Eastern Tukanoans share a ceremonial complex for male initiation known as Yurupari, in  
446 which sacred flutes and trumpets are only played by males, as well as sharing myths concerning the hero  
447 Kúwai (Hugh-Jones 1979; Jackson 1983; Vidal 2002). In addition, the Eastern Tukanoan groups from the  
448 Pira-Parana and Apaporis rivers (Barasano, Makuna, and Tanimuka) reveal Arawakan influence, since  
449 they also practice dances with masks during the season of high abundance of the palm tree fruit pupunha  
450 (*Bactris gasipaes*) (Hugh-Jones 1979). The genetic distances among populations provide additional  
451 evidence in this regard: although the global  $\Phi_{ST}$  value of 0.11 indicates moderate differentiation (Hartl  
452 and Clark 2007), this value is driven by three populations, namely the Siona, Sikuani, and Nukak. These  
453 are highly differentiated from the other populations, likely reflecting the effects of genetic drift due to  
454 bottlenecks, as indicated by the positive Tajima's D values (Figure 3) and the distribution of pairwise  
455 differences (Supporting information Figure S2). When we exclude these populations, we observe an  
456 average pairwise  $\Phi_{ST}$  of 0.07, and populations appear close together in the MDS plot (Figure 5),  
457 indicating low genetic differentiation among NWA populations.

458 In this general picture the Eastern Tukanoan groups stand apart, since they cluster together in the CA and  
459 MDS plots (Figure 2 and Figure 5), and their pairwise genetic distances are small and non-significant  
460 (Figure S6). Linguists have proposed a time depth for the Tukanoan family of 2000-2500 years, based on

461 a comparison of the diversity in Tukanoan languages with the diversity in Romance and Germanic  
462 languages (Chacon 2014). The time depth of the Eastern Tukanoan branch (and thus the time to the most  
463 recent common ancestor of the Eastern Tukanoan languages) would be even more recent, which might  
464 indicate that the peoples speaking these languages share recent common genetic ancestry as well (at least  
465 on the maternal side). However, the Eastern Tukanoan groups practice linguistic exogamy, and the close  
466 genetic relationships among these populations might be the result of this marital system in which women  
467 move among different ethnolinguistic groups. The consequences of the linguistic exogamy are also  
468 evident in the gene diversity values and the patterns of shared haplotypes. Eastern Tukanoans are the  
469 groups with the highest values of gene diversity, and they share more haplotypes among themselves than  
470 with other non-Eastern Tukanoan groups. In addition, their haplotypes tend to be closely related, as can  
471 be seen in the phylogenetic networks (Supporting information Figure S5). Analyses of the Y-chromosome  
472 as well as nuclear markers will help to disentangle the effects of linguistic exogamy vs. recent common  
473 ancestry on the patterns of genetic variation among Eastern Tukanoan groups.

474 The Tanimuka stand apart from the other Eastern Tukanoan groups in the analyses, which may reflect  
475 their settlement further south, along the Apaporis and Mirití-Paraná rivers. Moreover, they do not  
476 participate in the exogamic system with other Eastern Tukanoan groups, but interact mainly with the  
477 Arawakan groups Yucuna and Matapi. This is reflected in the patterns of haplotype sharing (Figure 4) as  
478 well as in their language, which shows evidence of Arawakan influence (Barnes 1999; Chacon 2014).

479

#### 480 **The role of rivers in structuring genetic variation**

481 Besides language, geography is another important factor in structuring the patterns of genetic variation in  
482 human populations (Ramachandran et al. 2005; Schonberg et al. 2011; Wang et al. 2007). One of the most  
483 salient characteristics of the physical landscape of NWA is the high density of rivers that drain the area,  
484 and their importance for human populations was earlier recognized by explorers and ethnographers that

485 traveled through the region (Koch-Grünberg 1995; Wallace 1853). We found that the distribution along  
486 rivers is an additional important factor influencing the genetic structure of NWA populations: our  
487 AMOVA analyses (Table 4) show that clustering populations according to the rivers where they are  
488 distributed explains more of the genetic variation that is due to differences among groups than does  
489 grouping them by linguistic affiliation, i.e. populations living on the same river basin or in closely  
490 connected rivers are genetically more similar than those living on different rivers. This pattern is also  
491 observed in the distribution of sub-haplogroups among populations (Figure S1). For example, Curripaco  
492 and Puinave, who live on the Inírida and Atabapo rivers, are located close together in the plot, and the  
493 presence of Coreguaje, Yucu-Matapi, and Mur-Uitoto in the center of the plot could reflect their presence  
494 in a region where the Putumayo and Caquetá rivers are separated by their shortest distance, therefore  
495 facilitating contact among people inhabiting the basins and tributaries of these two rivers. Indeed, one  
496 Murui individual was sampled in a Coreguaje community, and two Uitoto individuals were sampled in  
497 the Mirití-Parana region, thus providing evidence for the movement of people among these groups. The  
498 results of the MRM analysis provide additional evidence in this regard: even though no correlation  
499 between genetic distances and geographic distances was observed via the Mantel test, we observed that  
500 adding river distances as an additional predictor variable resulted in an increase of around 3% of the R-  
501 square value (Table 5), indicating that rivers contribute to explaining a slightly higher percentage of the  
502 variation observed in the genetic distances.

503 Rivers in Amazonia serve a double function in providing a means of communication as well as  
504 subsistence, and the wide distribution of certain cultural traits (e.g., the production of Saladoid-  
505 Barranoid ceramics and circular plaza village settlement patterns), has been associated with the  
506 expansion of Arawakan-speaking populations along the extensive system of NWA waterways  
507 (Heckenberger 2002; Hornborg 2005; Lathrap 1970; Lowie 1948). They also mark a distinction in  
508 subsistence strategies between the more numerous “river people” that build canoes, settle along rivers,  
509 and rely on horticulture and fishing, and the “forest people” that inhabit the interfluvial areas, settle away

510 from the major rivers, and base their subsistence on foraging (Epps and Stenzel 2013). Additionally, the  
511 rivers have profound meanings and are embedded in the cosmogonies of several NWA indigenous  
512 groups. The Eastern Tukanoan creation myths describe the journeys that the ancestors of the people made  
513 to settle this world on board an anaconda canoe that travelled up the Vaupes River; from the anaconda's  
514 body all the Tukanoan siblings emerged (Chernela 2010; Jackson 1983). Arawakan groups also describe a  
515 series of ever returning voyages from the sacred center of the world and the place of emergence of the  
516 first ancestors at the rapids of Hípana on the Aiary River, covering the major arteries of the Rio Negro,  
517 Orinoco, and Amazon (Wright 2002; Zucchi 2002). Therefore, our findings about the role of rivers in  
518 structuring the genetic variation are in keeping with the pivotal role that rivers play for NWA populations.

519 The lack of fit between genetic and simple geographic distances may be the result of relatively recent  
520 movements and the displacement of ethnolinguistic groups from their traditional territories. Population  
521 dynamics and population sizes were drastically altered during the last five centuries, starting with early  
522 colonial times (16<sup>th</sup> and 17<sup>th</sup> centuries), when many groups were decimated by newly introduced  
523 epidemics and moved away from the accessible margins of the major rivers to avoid the slave raids of the  
524 Spanish, Portuguese, and Dutch colonizers. Similar perturbations happened during the time of the  
525 Christian missions in the 18<sup>th</sup> century, when many groups were forced to relocate to multiethnic mission  
526 settlements, and finally during the rubber boom between the 19<sup>th</sup> and beginning of the 20<sup>th</sup> centuries,  
527 when the groups who managed to escape the mercenaries exploiting the rubber fields resettled in remote  
528 areas in the headwaters of small rivers (Dixon and Aikhenvald 1999; Hill and Santos-Granero 2002;  
529 Stenzel 2005). The inferred reduction in population size of the Tanimuka, Sikuani, Guayabero, and  
530 Nukak, as indicated by their low diversity values, the positive Tajima's D values (Figure 3), the  
531 distribution of pairwise differences (Figure S2), and the reconstruction of effective population sizes  
532 (Figure S3C, D), might be a result of these social upheavals.

533

534

535 **The impact of subsistence strategies on the genetic diversity**

536 NWA contains groups with different subsistence strategies, with manioc (*Manihot esculenta*) as the main  
537 staple among horticulturalist groups, who are best described as riverine horticultural societies, given their  
538 close association with rivers. The Nukak, in contrast, are traditionally foragers, who still rely on hunting  
539 and gathering and move throughout the extensive area between the Guaviare and Inírida rivers.  
540 Furthermore, the Guayabero, Sikuani, and Puinave are traditional foragers who have only recently  
541 undergone the transition to agriculture, and are therefore considered as HGP together with Nukak in our  
542 analyses (Table 1). Our data show that agricultural societies (AG) have higher levels of diversity on  
543 average than forager groups (HGP) as indicated by the Mann-Whitney U test (P-value = 0.03), while the  
544 HGP groups have larger values of Tajima's D statistic (Figure 3) and do not show signals of population  
545 expansion (Figure S3). These findings agree with patterns reported for other hunter-gatherer populations  
546 around the world (Aime et al. 2013; Excoffier and Schneider 1999; Oota et al. 2005) and contrast with the  
547 genetic signature of an agricultural way of life, namely higher effective population size (Patin et al. 2014),  
548 higher levels of diversity, and significantly negative values of Tajima's D test (Aime et al. 2013).

549 However, subsistence strategies are flexible and diverse among NWA populations. Horticulturalists  
550 complement their diet with occasional hunting and/or gathering of several kinds of palm fruit, and  
551 extensive exchanges between AG and HGP groups have been reported. In this system, HGP populations  
552 usually provide meat and several products from the forest, such as the poison curare for the tips of darts  
553 and arrows, in exchange for different cultivated products, such as manioc and other trade goods (Epps and  
554 Stenzel 2013; Jackson 1983; Milton 1984). Nonetheless, this exchange seems to be exclusively restricted  
555 to goods and labor, with little or no intermarriage documented between AG and HGP groups (Aikhenvald  
556 1996). In contrast, we observed shared haplotypes between AG and HGP groups, which likely reflects  
557 intermarriage or recent common ancestry. For example, the most frequent haplotype in the Arawakan AG  
558 group Curripaco (Haplotype H\_84 in Figure S4) is observed at high frequency in the HGP Nukak (and in  
559 the Eastern Tukanoan AG group Siriano). Moreover, the HGP Puinave share several haplotypes with the

560 AG group Curripaco (H\_219, H\_161, H\_117 in Figure S4), a likely result of intermarriage between these  
561 groups, since there are communities on the Inírida River where one finds individuals from both groups.  
562 Similarly, the Guahiban HGP groups Sikuni and Guayabero exhibit a haplotype at high frequency (H\_43  
563 in Figure S4) that is shared with the AG Ach-Piapoco as well as further haplotypes related to haplotypes  
564 found in AG Arawakan groups (cluster I Figure S5C and cluster II S5B). This may reflect contact among  
565 them, since there are Piapoco communities on the lower Guaviare River as well as Sikuni communities  
566 on the Meta River, places where these groups overlap. However, it is difficult to determine the direction  
567 of the gene flow or to distinguish between contact and common ancestry as explanations for shared  
568 mtDNA haplotypes. Nevertheless, it is plausible that where haplotypes are shared the source population is  
569 the one in which the haplotype is present at higher frequency. For instance, the shared haplotype between  
570 the HGP Puinave and the AG Curripaco (H\_219 in Figure S4) has a likely origin in Puinave, because of  
571 its higher frequency and the presence of related haplotypes in Puinave (cluster I Figure S5B). The source  
572 of the shared haplotype among the HGP Nukak and the AG Curripaco and Siriano (H\_84 in Figure S4) is  
573 more difficult to infer, since its frequency is similar in the Nukak and in the Curripaco; furthermore, three  
574 other haplotypes present in the HGP Nukak and Guayabero are only one mutation apart from it (cluster II  
575 Figure S5B). Therefore, it is likely that this haplotype, too, moved from the HGP populations into the AG  
576 Curripaco. A similar explanation could be given for H\_43 in Figure S4, which is part of the cluster I in  
577 Figure S5C, moving from the HGP Guayabero and Sikuni into the AG Ach-Piapoco. Thus, these  
578 observations seem to fit a scenario of asymmetric gene flow in which women move from HGP to AG, a  
579 pattern that has been reported for populations in Central and Southern Africa (Barbieri et al. 2014;  
580 Destro-Bisol et al. 2004; Verdu et al. 2013). However, this scenario will be further refined by analyses of  
581 Y-chromosome and genome-wide data, which will allow us to determine whether the gene flow among  
582 groups was sex-biased (i.e. involving the movement of only females or only males among groups) and to  
583 make inferences about the time and magnitude of these events.



584 In conclusion, this study provides new data from this remote and little-studied part of the world, which  
585 allow insights into the impact of cultural practices on the patterns of genetic variation and on the  
586 population dynamics of NWA groups. Although our current data do not allow us to distinguish whether  
587 the population movements took place prior to European contact or only later, analyses of Y-chromosome  
588 variation and genome-wide data will shed further light on the genetic history of NWA. Furthermore,  
589 historical genetic studies will benefit from more archaeological work in NWA, since huge areas remain  
590 completely unexplored.

591

## 592 **Acknowledgments**

593 We are grateful to all sample donors, communities, community leaders, and regional indigenous  
594 organizations. L.A. especially gives thanks to Consejo Regional Indígena del Guaviare, Asociación de  
595 Autoridades Tradicionales y Cabildos de los Pueblos Indígenas del Municipio de Leguízamo y Alto  
596 Resguardo Predio Putumayo, Asociación de Cabildos Indígenas del Trapecio Amazónico, Organización  
597 Zonal Indígena Del Putumayo, the staff of Parques Nacionales Naturales in Puerto Leguízamo, the office  
598 of Indigenous Affairs in Puerto Inírida, Rafael Rodriguez, William Yucuna, the late Gustavo Arias, and  
599 all people who helped during the fieldtrips for their valuable collaboration and warm welcome during our  
600 stay in their communities. We also acknowledge Roland Schroeder for laboratory technical assistance,  
601 and Enrico Macholdt, Alexander Huebner, Irina Pugach, and Michael Dannemann for advice with the  
602 data analyses. B.P. acknowledges the LABEX ASLAN (ANR-10-LABX-0081) of Université de Lyon for  
603 its financial support within the program “Investissements d’Avenir” (ANR-11-IDEX-0007) of the French  
604 government operated by the National Research Agency (ANR). L.A. was supported by a graduate grant  
605 from COLCIENCIAS; research was supported by funds from the Max Planck Society.

606

607

608 **LITERATURE CITED**

609

- 610 Aceituno FJ, Loaiza N, Delgado-Burbano ME, and Barrientos G. 2013. The initial human settlement of  
611 Northwest South America during the Pleistocene/Holocene transition: Synthesis and perspectives.  
612 *Quaternary International* 301:23-33.
- 613 Achilli A, Perego UA, Lancioni H, Olivieri A, Gandini F, Kashani BH, Battaglia V, Grugni V,  
614 Angerhofer N, Rogers MP et al. . 2013. Reconciling migration models to the Americas with the  
615 variation of North American native mitogenomes. *Proc Natl Acad Sci U S A*.
- 616 Aikhenvald AY. 1996. Areal diffusion in Northwest Amazonia: The case of Tariana. *Anthropological*  
617 *Linguistics* 38(1).
- 618 Aikhenvald AY. 1999. The Arawak language family. In: Dixon RMW, and Aikhenvald AY, editors. *The*  
619 *Amazonian Languages*. Cambridge ; New York: Cambridge University Press.
- 620 Aime C, Laval G, Patin E, Verdu P, Segurel L, Chaix R, Hegay T, Quintana-Murci L, Heyer E, and  
621 Austerlitz F. 2013. Human genetic data reveal contrasting demographic patterns between  
622 sedentary and nomadic populations that predate the emergence of farming. *Mol Biol Evol*  
623 30(12):2629-2644.
- 624 Andrews RM, Kubacka I, Chinnery PF, Lightowlers RN, Turnbull DM, and Howell N. 1999. Reanalysis  
625 and revision of the Cambridge reference sequence for human mitochondrial DNA. *Nat Genet*  
626 23(2):147.
- 627 Bailliet G, Rothhammer F, Carnese FR, Bravi CM, and Bianchi NO. 1994. Founder mitochondrial  
628 haplotypes in Amerindian populations. *Am J Hum Genet* 55(1):27-33.
- 629 Barbieri C, Butthof A, Bostoen K, and Pakendorf B. 2013. Genetic perspectives on the origin of clicks in  
630 Bantu languages from southwestern Zambia. *Eur J Hum Genet* 21(4):430-436.
- 631 Barbieri C, Guldemann T, Naumann C, Gerlach L, Berthold F, Nakagawa H, Mpoloka SW, Stoneking M,  
632 and Pakendorf B. 2014. Unraveling the complex maternal history of Southern African Khoisan  
633 populations. *Am J Phys Anthropol* 153(3):435-448.
- 634 Barbieri C, Heggarty P, Castri L, Luiselli D, and Pettener D. 2011. Mitochondrial DNA variability in the  
635 Titicaca basin: Matches and mismatches with linguistics and ethnohistory. *Am J Hum Biol*  
636 23(1):89-99.
- 637 Barbieri C, Whitten M, Beyer K, Schreiber H, Li M, and Pakendorf B. 2012. Contrasting maternal and  
638 paternal histories in the linguistic context of Burkina Faso. *Mol Biol Evol* 29(4):1213-1223.
- 639 Barnes J. 1999. Tucano. In: Dixon RMW, and Aikhenvald AY, editors. *The Amazonian Languages*. New  
640 York: Cambridge University Press.
- 641 Bodner M, Perego UA, Huber G, Fendt L, Rock AW, Zimmermann B, Olivieri A, Gomez-Carballa A,  
642 Lancioni H, Angerhofer N et al. 2012. Rapid coastal spread of First Americans: novel insights  
643 from South America's Southern Cone mitochondrial genomes. *Genome Res* 22(5):811-820.
- 644 Bolnick DA, and Smith DG. 2003. Unexpected patterns of mitochondrial DNA variation among Native  
645 Americans from the southeastern United States. *Am J Phys Anthropol* 122(4):336-354.
- 646 Bonatto SL, and Salzano FM. 1997. Diversity and age of the four major mtDNA haplogroups, and their  
647 implications for the peopling of the New World. *Am J Hum Genet* 61(6):1413-1423.
- 648 Campbell L. 1997. *American Indian Languages: The Historical Linguistics of Native America*: Oxford  
649 University Press.
- 650 Chacon T. 2014. A Revised Proposal of Proto-Tukanoan Consonants and Tukanoan Family  
651 Classification. *Int J Am Linguist* 80(3):275-322.
- 652 Chacon T, and Cayón L. 2013. Considerações sobre a exogamia linguística no Noroeste Amazônico.  
653 *Revista de Letras da Universidade Católica de Brasília* 6.
- 654 Chernela JM. 2010. *The Wanano Indians of the Brazilian Amazon: A Sense of Space*: University of  
655 Texas Press.

- 656 Darriba D, Taboada GL, Doallo R, and Posada D. 2012. jModelTest 2: more models, new heuristics and  
657 parallel computing. *Nat Methods* 9(8):772.
- 658 de Saint Pierre M, Gandini F, Perego UA, Bodner M, Gomez-Carballa A, Corach D, Angerhofer N,  
659 Woodward SR, Semino O, Salas A et al. 2012. Arrival of Paleo-Indians to the southern cone of  
660 South America: new clues from mitogenomes. *PLoS One* 7(12):e51311.
- 661 Dediu D, and Levinson SC. 2012. Abstract Profiles of Structural Stability Point to Universal Tendencies,  
662 Family-Specific Factors, and Ancient Connections between Languages. *Plos One* 7(9).
- 663 Delfin F, Min-Shan Ko A, Li M, Gunnarsdottir ED, Tabbada KA, Salvador JM, Calacal GC, Sagum MS,  
664 Datar FA, Padilla SG et al. 2014. Complete mtDNA genomes of Filipino ethnolinguistic groups:  
665 a melting pot of recent and ancient lineages in the Asia-Pacific region. *Eur J Hum Genet*  
666 22(2):228-237.
- 667 Denevan WM. 1992. The Pristine Myth: The Landscape of the Americas in 1492. *Annals of the*  
668 *Association of American Geographers* 82(3):369-385.
- 669 Destro-Bisol G, Donati F, Coia V, Boschi I, Verginelli F, Caglia A, Tofanelli S, Spedini G, and Capelli C.  
670 2004. Variation of female and male lineages in sub-Saharan populations: the importance of  
671 sociocultural factors. *Mol Biol Evol* 21(9):1673-1682.
- 672 Dixon RMW, and Aikhenvald AY. 1999. *The Amazonian Languages*: Cambridge University Press.
- 673 Dray S, and Dufour AB. 2007. The ade4 package: implementing the duality diagram for ecologists.  
674 *Journal of Statistical Software* 22(4):1-20.
- 675 Drummond AJ, Suchard MA, Xie D, and Rambaut A. 2012. Bayesian phylogenetics with BEAUti and the  
676 BEAST 1.7. *Mol Biol Evol* 29(8):1969-1973.
- 677 Duggan AT, Evans B, Friedlaender FR, Friedlaender JS, Koki G, Merriwether DA, Kayser M, and  
678 Stoneking M. 2014. Maternal history of Oceania from complete mtDNA genomes: contrasting  
679 ancient diversity with recent homogenization due to the Austronesian expansion. *Am J Hum*  
680 *Genet* 94(5):721-733.
- 681 Duggan AT, Whitten M, Wiebe V, Crawford M, Butthof A, Spitsyn V, Makarov S, Novgorodov I,  
682 Osakovsky V, and Pakendorf B. 2013. Investigating the prehistory of Tungusic peoples of Siberia  
683 and the Amur-Ussuri region with complete mtDNA genome sequences and Y-chromosomal  
684 markers. *PLoS One* 8(12):e83570.
- 685 Epps P, and Stenzel K. 2013. Upper Rio Negro: cultural and linguistic interaction in Northwestern  
686 Amazonia. Rio de Janeiro: Museu do Índio – FUNAI, Museu Nacional.
- 687 Eriksen L. 2011. *Nature and culture in prehistoric Amazonia* [Ph.D.]. Lund: Lund University.
- 688 Excoffier L, and Lischer HE. 2010. Arlequin suite ver 3.5: a new series of programs to perform  
689 population genetics analyses under Linux and Windows. *Mol Ecol Resour* 10(3):564-567.
- 690 Excoffier L, and Schneider S. 1999. Why hunter-gatherer populations do not show signs of pleistocene  
691 demographic expansions. *Proc Natl Acad Sci U S A* 96(19):10597-10602.
- 692 Fagundes NJ, Kanitz R, Eckert R, Valls AC, Bogo MR, Salzano FM, Smith DG, Silva WA, Jr., Zago  
693 MA, Ribeiro-dos-Santos AK et al. 2008. Mitochondrial population genomics supports a single  
694 pre-Clovis origin with a coastal route for the peopling of the Americas. *Am J Hum Genet*  
695 82(3):583-592.
- 696 Fehren-Schmitz L, Llamas B, Lindauer S, Tomasto-Cagigao E, Kuzminsky S, Rohland N, Santos FR,  
697 Kaulicke P, Valverde G, Richards SM et al. 2015. A Re-Appraisal of the Early Andean Human  
698 Remains from Lauricocha in Peru. *PLoS One* 10(6):e0127141.
- 699 Franco R. 2002. *Los carijonas de Chiribiquete Bogotá*: Fundación Puerto Rastrojo.
- 700 Fuselli S, Tarazona-Santos E, Dupanloup I, Soto A, Luiselli D, and Pettener D. 2003. Mitochondrial  
701 DNA diversity in South America and the genetic history of Andean highlanders. *Mol Biol Evol*  
702 20(10):1682-1691.
- 703 Gaya-Vidal M, Moral P, Saenz-Ruales N, Gerbault P, Tonasso L, Villena M, Vasquez R, Bravi CM, and  
704 Dugoujon JM. 2011. mtDNA and Y-chromosome diversity in Aymaras and Quechuas from  
705 Bolivia: different stories and special genetic traits of the Andean Altiplano populations. *Am J*  
706 *Phys Anthropol* 145(2):215-230.

- 707 Gnecco C, and Mora S. 1997. Late Pleistocene early Holocene tropical forest occupations at San Isidro  
708 and Pena Roja, Colombia. *Antiquity* 71(273):683-690.
- 709 Goslee SC, and Urban DL. 2007. The ecodist package for dissimilarity-based analysis of ecological data.  
710 *Journal of Statistical Software* 22(7):1-19.
- 711 Gunnarsdottir ED, Li M, Bauchet M, Finstermeier K, and Stoneking M. 2011. High-throughput  
712 sequencing of complete human mtDNA genomes from the Philippines. *Genome Res* 21(1):1-11.
- 713 Hall TA. 1999. BioEdit: a user-friendly biological sequence alignment editor and analysis program for  
714 Windows 95/98/NT. *Nucl Acids Symp Ser* 41:4.
- 715 Hartl DL, and Clark AG. 2007. *Principles of population genetics*. Sunderland, Massachusetts: Sinauer  
716 Associates, Inc.
- 717 Heckenberger MJ. 2002. Rethinking the Arawakan Diaspora: Hierarchy, Regionality, and the Amazonian  
718 Formative. In: Hill JD, and Santos-Granero F, editors. *Comparative Arawakan Histories:  
719 Rethinking Language Family and Culture Area in Amazonia*: University of Illinois Press. p 99-  
720 122.
- 721 Heckenberger MJ. 2008. Amazonian Mosaics: Identity, Interaction, and Integration in the Tropical Forest.  
722 In: Silverman H, and Isbell WH, editors. *The Handbook of South American Archaeology*. New  
723 York, NY: Springer New York. p 941-961.
- 724 Hijmans RJ. 2016. *geosphere: Spherical Trigonometry*. R package version 1.5-5 ed.
- 725 Hill JD, and Santos-Granero F. 2002. *Comparative Arawakan Histories: Rethinking Language Family and  
726 Culture Area in Amazonia*. Urbana: University of Illinois Press.
- 727 Hock HH, and Joseph BD. 2009. *Language History, Language Change, and Language Relationship: An  
728 Introduction to Historical and Comparative Linguistics, Second Edition*. Trends Linguist-Stud  
729 218:1-588.
- 730 Hornborg A. 2005. Ethnogenesis, regional integration, and ecology in prehistoric Amazonia - Toward a  
731 system perspective. *Curr Anthropol* 46(4):589-620.
- 732 Hugh-Jones S. 1979. *The palm and the Pleiades : initiation and cosmology in northwest Amazonia*.  
733 Cambridge ; New York: Cambridge University Press. xvi, 332 p., 332 leaves of plates p.
- 734 Jackson JE. 1983. *The Fish People: Linguistic Exogamy And Tukanoan Identity In Northwest Amazonia*.  
735 Cambridge: Cambridge University Press. xix, 287 p.
- 736 Kassambara A, and Mundt F. 2016. *factoextra: Extract and Visualize the Results of Multivariate Data  
737 Analyses*. R package version 1.0.3 ed.
- 738 Katoh K, and Standley DM. 2013. MAFFT multiple sequence alignment software version 7:  
739 improvements in performance and usability. *Mol Biol Evol* 30(4):772-780.
- 740 Keyeux G, Rodas C, Gelvez N, and Carter D. 2002. Possible migration routes into South America  
741 deduced from mitochondrial DNA studies in Colombian Amerindian populations. *Hum Biol*  
742 74(2):211-233.
- 743 Kirby KR, Gray RD, Greenhill SJ, Jordan FM, Gomes-Ng S, Bibiko HJ, Blasi DE, Botero CA, Bownern  
744 C, Ember CR et al. 2016. D-PLACE: A Global Database of Cultural, Linguistic and  
745 Environmental Diversity. *Plos One* 11(7).
- 746 Kircher M, Sawyer S, and Meyer M. 2012. Double indexing overcomes inaccuracies in multiplex  
747 sequencing on the Illumina platform. *Nucleic Acids Res* 40(1):e3.
- 748 Kivisild T. 2015. Maternal ancestry and population history from whole mitochondrial genomes. *Investig  
749 Genet* 6:3.
- 750 Kloss-Brandstatter A, Pacher D, Schonherr S, Weissensteiner H, Binna R, Specht G, and Kronenberg F.  
751 2011. HaploGrep: a fast and reliable algorithm for automatic classification of mitochondrial DNA  
752 haplogroups. *Hum Mutat* 32(1):25-32.
- 753 Ko AM, Chen CY, Fu Q, Delfin F, Li M, Chiu HL, Stoneking M, and Ko YC. 2014. Early Austronesians:  
754 into and out of Taiwan. *Am J Hum Genet* 94(3):426-436.
- 755 Koch-Grünberg T. 1995. *Dos años entre los indios: viajes por el noroeste brasileño, 1903-1905: Editorial  
756 Universidad Nacional*.

- 757 Kondo Rd. 2002. En pos de los guahibos : prehistóricos, históricos y actuales : con pistas lingüísticas.  
758 Bogotá, Colombia: Editorial Alberto Lleras Camargo.
- 759 Landaburu J. 2000. Clasificación de las lenguas indígenas de Colombia. In: González PMS, Rodríguez,  
760 M. M. L., & Instituto Caro y Cuervo., editor. Lenguas indígenas de Colombia, una visión  
761 descriptiva. Santafé de Bogotá: Instituto Caro y Cuervo.
- 762 Langmead B, and Salzberg SL. 2012. Fast gapped-read alignment with Bowtie 2. *Nat Methods* 9(4):357--  
763 359.
- 764 Lathrap DW. 1970. *The Upper Amazon*. London: Thames & Hudson.
- 765 Le S, Josse J, and Husson F. 2008. FactoMineR: An R Package for Multivariate Analysis. *Journal of*  
766 *Statistical Software* 25(1):1-18.
- 767 Lee EJ, and Merriwether DA. 2015. Identification of Whole Mitochondrial Genomes from Venezuela and  
768 Implications on Regional Phylogenies in South America. *Hum Biol* 87(1):29-38.
- 769 Lewis CM, Jr., Lizarraga B, Tito RY, Lopez PW, Iannacone GC, Medina A, Martinez R, Polo SI, De La  
770 Cruz AF, Caceres AM et al. 2007. Mitochondrial DNA and the peopling of South America. *Hum*  
771 *Biol* 79(2):159-178.
- 772 Li H, and Durbin R. 2009. Fast and accurate short read alignment with Burrows-Wheeler transform.  
773 *Bioinformatics* 25(14):1754--1760.
- 774 Li M, Schroeder R, Ko A, and Stoneking M. 2012. Fidelity of capture-enrichment for mtDNA genome  
775 sequencing : influence of NUMTs. *Nucleic acids research*:1--8.
- 776 Llamas B, Fehren-Schmitz L, Valverde G, Soubrier J, Mallick S, Rohland N, Nordenfelt S, Valdiosera C,  
777 Richards SM, Rohrlach A et al. 2016. Ancient mitochondrial DNA provides high-resolution time  
778 scale of the peopling of the Americas. *Sci Adv* 2(4):e1501385.
- 779 Lowie RH. 1948. *The Tropical Forests: An introduction*. In: Steward JH, editor. *Handbook of South*  
780 *American Indians*. Washington: U.S. G.P.O.
- 781 Malhi RS, Schultz BA, and Smith DG. 2001. Distribution of mitochondrial DNA lineages among Native  
782 American tribes of Northeastern North America. *Hum Biol* 73(1):17-55.
- 783 Maricic T, Whitten M, and Paabo S. 2010. Multiplexed DNA sequence capture of mitochondrial genomes  
784 using PCR products. *PLoS One* 5(11):e14004.
- 785 Marrero AR, Silva-Junior WA, Bravi CM, Hutz MH, Petzl-Erler ML, Ruiz-Linares A, Salzano FM, and  
786 Bortolini MC. 2007. Demographic and evolutionary trajectories of the Guarani and Kaingang  
787 natives of Brazil. *Am J Phys Anthropol* 132(2):301-310.
- 788 Meggers BJ. 1954. Environmental Limitation on the Development of Culture. *American Anthropologist*  
789 56:801-824.
- 790 Meggers J. 1948. *The archeology of the Amazon Basin*. In: Steward JH, editor. *Handbook of South*  
791 *American Indians: Washington : U.S. G.P.O.*
- 792 Melton PE, Briceno I, Gomez A, Devor EJ, Bernal JE, and Crawford MH. 2007. Biological relationship  
793 between Central and South American Chibchan speaking populations: evidence from mtDNA.  
794 *Am J Phys Anthropol* 133(1):753-770.
- 795 Miller SA, Dykes DD, and Polesky HF. 1988. A simple salting out procedure for extracting DNA from  
796 human nucleated cells. *Nucleic Acids Res* 16(3):1215.
- 797 Milton K. 1984. Protein and Carbohydrate Resources of the Maku Indians of Northwestern Amazonia.  
798 *American Anthropologist* 86(1):7-27.
- 799 Mizuno F, Gojobori J, Wang L, Onishi K, Sugiyama S, Granados J, Gomez-Trejo C, Acuna-Alonzo V,  
800 and Ueda S. 2014. Complete mitogenome analysis of indigenous populations in Mexico: its  
801 relevance for the origin of Mesoamericans. *J Hum Genet* 59(7):359-367.
- 802 Nettle D. 1999. Linguistic diversity of the Americas can be reconciled with a recent colonization. *Proc*  
803 *Natl Acad Sci U S A* 96(6):3325-3329.
- 804 Nimuendajú C. 1950. Reconhecimento dos rios Içána, Ayarí e Uaupés. *Journal de la Société des*  
805 *Américanistes* 39.

- 806 Oota H, Pakendorf B, Weiss G, von Haeseler A, Pookajorn S, Settheetham-Ishida W, Tiwawech D, Ishida  
807 T, and Stoneking M. 2005. Recent origin and cultural reversion of a hunter-gatherer group. *PLoS*  
808 *Biol* 3(3):e71.
- 809 Patin E, Siddle KJ, Laval G, Quach H, Harmant C, Becker N, Froment A, Regnault B, Lemee L, Gravel S  
810 et al. 2014. The impact of agricultural emergence on the genetic history of African rainforest  
811 hunter-gatherers and agriculturalists. *Nat Commun* 5:3163.
- 812 Perego UA, Achilli A, Angerhofer N, Accetturo M, Pala M, Olivieri A, Hooshiar Kashani B, Ritchie KH,  
813 Scozzari R, Kong QP et al. 2009. Distinctive Paleo-Indian migration routes from Beringia marked  
814 by two rare mtDNA haplogroups. *Curr Biol* 19(1):1-8.
- 815 Perego UA, Angerhofer N, Pala M, Olivieri A, Lancioni H, Hooshiar Kashani B, Carossa V, Ekins JE,  
816 Gomez-Carballa A, Huber G et al. 2010. The initial peopling of the Americas: a growing number  
817 of founding mitochondrial genomes from Beringia. *Genome Res* 20(9):1174-1179.
- 818 Pugach I, Matveev R, Spitsyn V, Makarov S, Novgorodov I, Osakovsky V, Stoneking M, and Pakendorf  
819 B. 2016. The Complex Admixture History and Recent Southern Origins of Siberian Populations.  
820 *Mol Biol Evol* 33(7):1777-1795.
- 821 Quinque D, Kittler R, Kayser M, Stoneking M, and Nasidze I. 2006. Evaluation of saliva as a source of  
822 human DNA for population and association studies. *Anal Biochem* 353(2):272-277.
- 823 Ramachandran S, Deshpande O, Roseman CC, Rosenberg NA, Feldman MW, and Cavalli-Sforza LL.  
824 2005. Support from the relationship of genetic and geographic distance in human populations for  
825 a serial founder effect originating in Africa. *Proc Natl Acad Sci U S A* 102(44):15942-15947.
- 826 Renaud G, Kircher M, Stenzel U, and Kelso J. 2013. freeIbis: an efficient basecaller with calibrated  
827 quality scores for Illumina sequencers. *Bioinformatics* 29(9):1208-1209.
- 828 Renaud G, Stenzel U, and Kelso J. 2014a. LeeHom: Adaptor trimming and merging for Illumina  
829 sequencing reads. *Nucleic Acids Research* 42(18):e141.
- 830 Renaud G, Stenzel U, Maricic T, Wiebe V, and Kelso J. 2014b. deML: Robust demultiplexing of Illumina  
831 sequences using a likelihood-based approach. *Bioinformatics*(October):1--3.
- 832 Santos-Granero F. 2002. The Arawakan Matrix: Ethos, Language, and History in Native South America.  
833 In: Hill JD, and Santos-Granero F, editors. *Comparative Arawakan Histories: Rethinking*  
834 *Language Family and Culture Area in Amazonia*. Urbana: University of Illinois Press. p 25-50.
- 835 Schonberg A, Theunert C, Li M, Stoneking M, and Nasidze I. 2011. High-throughput sequencing of  
836 complete human mtDNA genomes from the Caucasus and West Asia: high diversity and  
837 demographic inferences. *Eur J Hum Genet* 19(9):988-994.
- 838 Schurr TG. 2004. The peopling of the New World: Perspectives from molecular anthropology. *Annu Rev*  
839 *Anthropol* 33:551-583.
- 840 Soares P, Ermini L, Thomson N, Mormina M, Rito T, Rohl A, Salas A, Oppenheimer S, Macaulay V, and  
841 Richards MB. 2009. Correcting for purifying selection: an improved human mitochondrial  
842 molecular clock. *Am J Hum Genet* 84(6):740-759.
- 843 Sorensen AP. 1967. Multilingualism in the Northwest Amazon. *American Anthropologist* 69(6):670-684.
- 844 Stenzel K. 2005. Multilingualism in the Northwest Amazon, Revisited. *Idiomas Indígenas de*  
845 *Latinoamérica-II*. Austin: University of Texas.
- 846 Tajima F. 1989. Statistical method for testing the neutral mutation hypothesis by DNA polymorphism.  
847 *Genetics* 123(3):585-595.
- 848 Torres MM, Bravi CM, Bortolini MC, Duque C, Callegari-Jacques S, Ortiz D, Bedoya G, Groot de  
849 Restrepo H, and Ruiz-Linares A. 2006. A revertant of the major founder Native American  
850 haplogroup C common in populations from northern South America. *Am J Hum Biol* 18(1):59-  
851 65.
- 852 Torroni A, Schurr TG, Cabell MF, Brown MD, Neel JV, Larsen M, Smith DG, Vullo CM, and Wallace  
853 DC. 1993. Asian affinities and continental radiation of the four founding Native American  
854 mtDNAs. *Am J Hum Genet* 53(3):563-590.
- 855 Uribe Tobón CA, and Instituto Colombiano de Cultura H. 1992. *Geografía humana de Colombia*. Santa  
856 Fe de Bogotá: Instituto Colombiano de Cultura Hispánica.

- 857 van Oven M, and Kayser M. 2009. Updated comprehensive phylogenetic tree of global human  
858 mitochondrial DNA variation. *Hum Mutat* 30(2):E386-394.
- 859 Verdu P, Becker NS, Froment A, Georges M, Grugni V, Quintana-Murci L, Hombert JM, Van der Veen  
860 L, Le Bomin S, Bahuchet S et al. 2013. Sociocultural behavior, sex-biased admixture, and  
861 effective population sizes in Central African Pygmies and non-Pygmies. *Mol Biol Evol*  
862 30(4):918-937.
- 863 Vidal SM. 1997. Liderazgo y confederaciones multiétnicas amerindias en la amazonia luso-hispana del  
864 Siglo XVIII *REVISTA ANTROPOLÓGICA* 87:19-46.
- 865 Vidal SM. 2002. Secret Religious Cults and Political Leadership: Multiethnic Confederacies from  
866 Northwestern Amazonia. *Comparative Arawakan Histories: University of Illinois Press.* p 248-  
867 268.
- 868 Wallace AR. 1853. A narrative of travels on the Amazon and Rio Negro: with an account of the native  
869 tribes, and observations on the climate, geology, and natural history of the Amazon valley.  
870 London: Reeve and Co.
- 871 Wang S, Lewis CM, Jakobsson M, Ramachandran S, Ray N, Bedoya G, Rojas W, Parra MV, Molina JA,  
872 Gallo C et al. 2007. Genetic variation and population structure in native Americans. *PLoS Genet*  
873 3(11):e185.
- 874 Wright RM. 2002. Prophetic Traditions among the Baniwa and Other Arawakan Peoples of the Northwest  
875 Amazon. *Comparative Arawakan Histories: University of Illinois Press.* p 269-294.
- 876 Yunusbayev B, Metspalu M, Jarve M, Kutuev I, Rootsi S, Metspalu E, Behar DM, Varendi K, Sahakyan  
877 H, Khusainova R et al. 2012. The Caucasus as an asymmetric semipermeable barrier to ancient  
878 human migrations. *Mol Biol Evol* 29(1):359-365.
- 879 Zucchi A. 2002. A New Model of the Northern Arawakan Expansion. In: Hill JD, and Santos-Granero F,  
880 editors. *Comparative Arawakan Histories: Rethinking Language Family and Culture Area in*  
881 *Amazonia. Urbana: University of Illinois Press.* p 199-222.
- 882
- 883

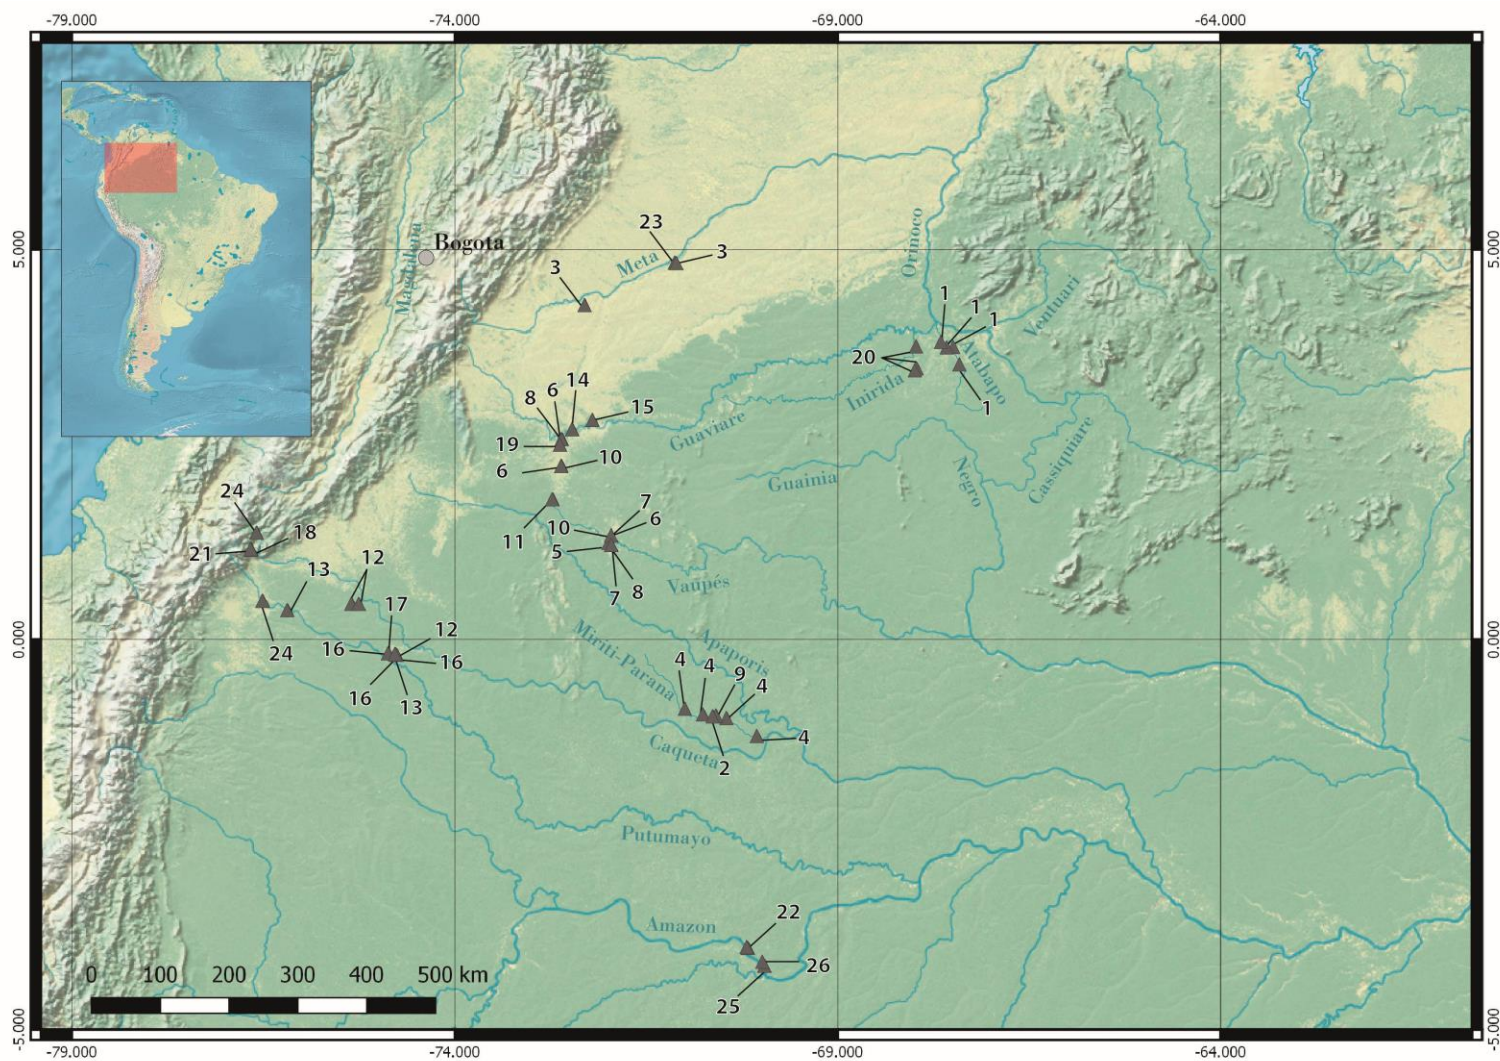

884

885 **Figure 1.** Geographic location of the sampling sites. Every triangle corresponds to a single community, which may contain more than one  
 886 ethnolinguistic group. 1. Curripaco and Bare, 2. Matapi, 3. Ach-Piapoco, 4. Yucuna, 5. Carijona, 6. Desano, Yuruti, Pisamira, and  
 887 Karapana, 7. Pira-Wanano, 8. Siriano, 9. Tanimuka, 10. Tukano, 11. Tuyuca and Tatuyo, 12. Coreguaje, 13. Siona, 14. Guayabero, 15.  
 888 Sikuani, 16. Murui, 17. Uitoto, 18. Kamentsa, 19. Nukak, 20. Puinave, 21. Pasto, 22. Yagua, 23. Saliba, 24. Inga, 25. Tikuna, 26. Cocama.



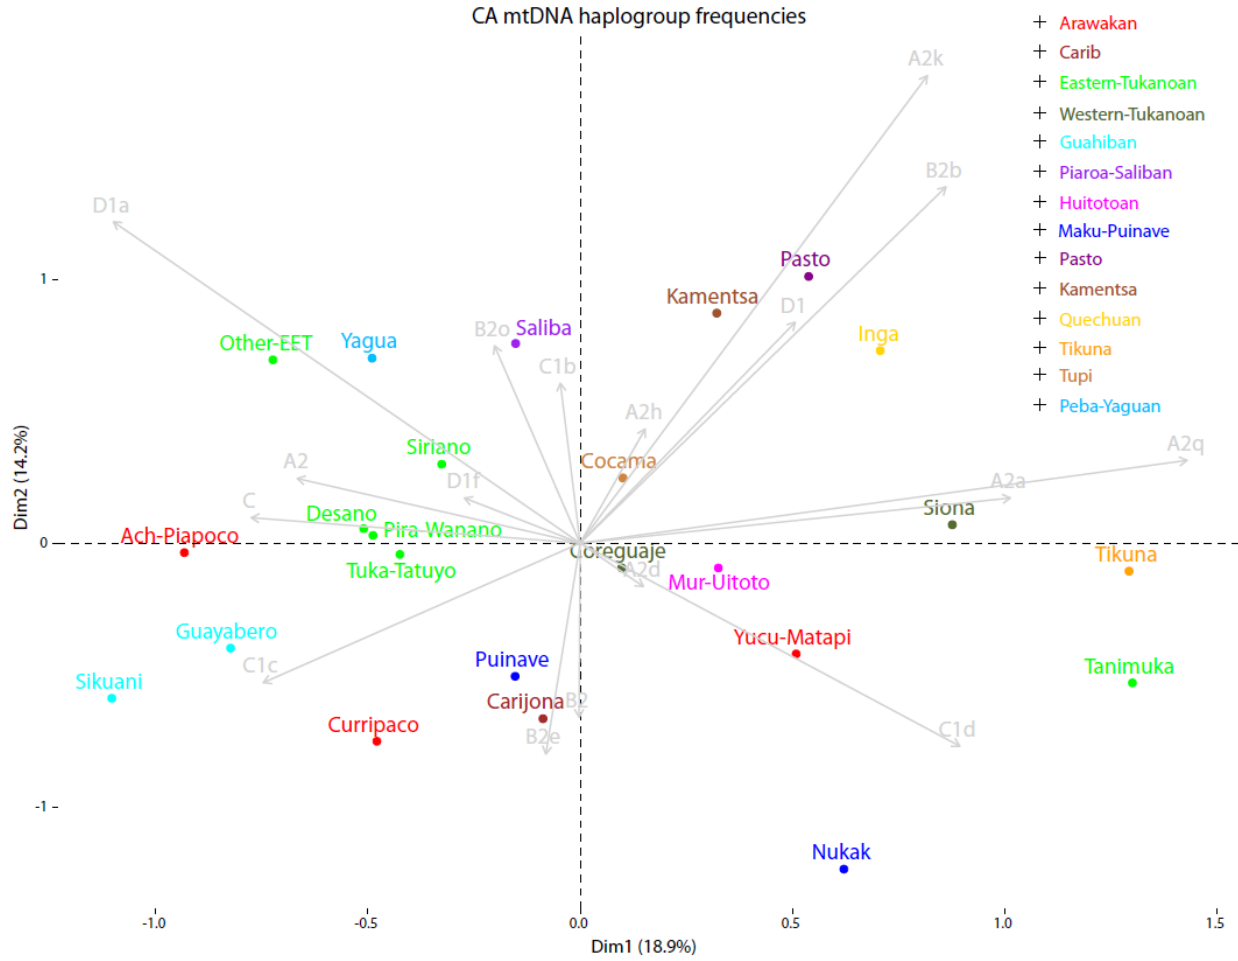

889

890 **Figure 2.** Correspondence analysis based on the sub-haplogroup frequencies by population. Populations  
 891 are color-coded by linguistic affiliation.

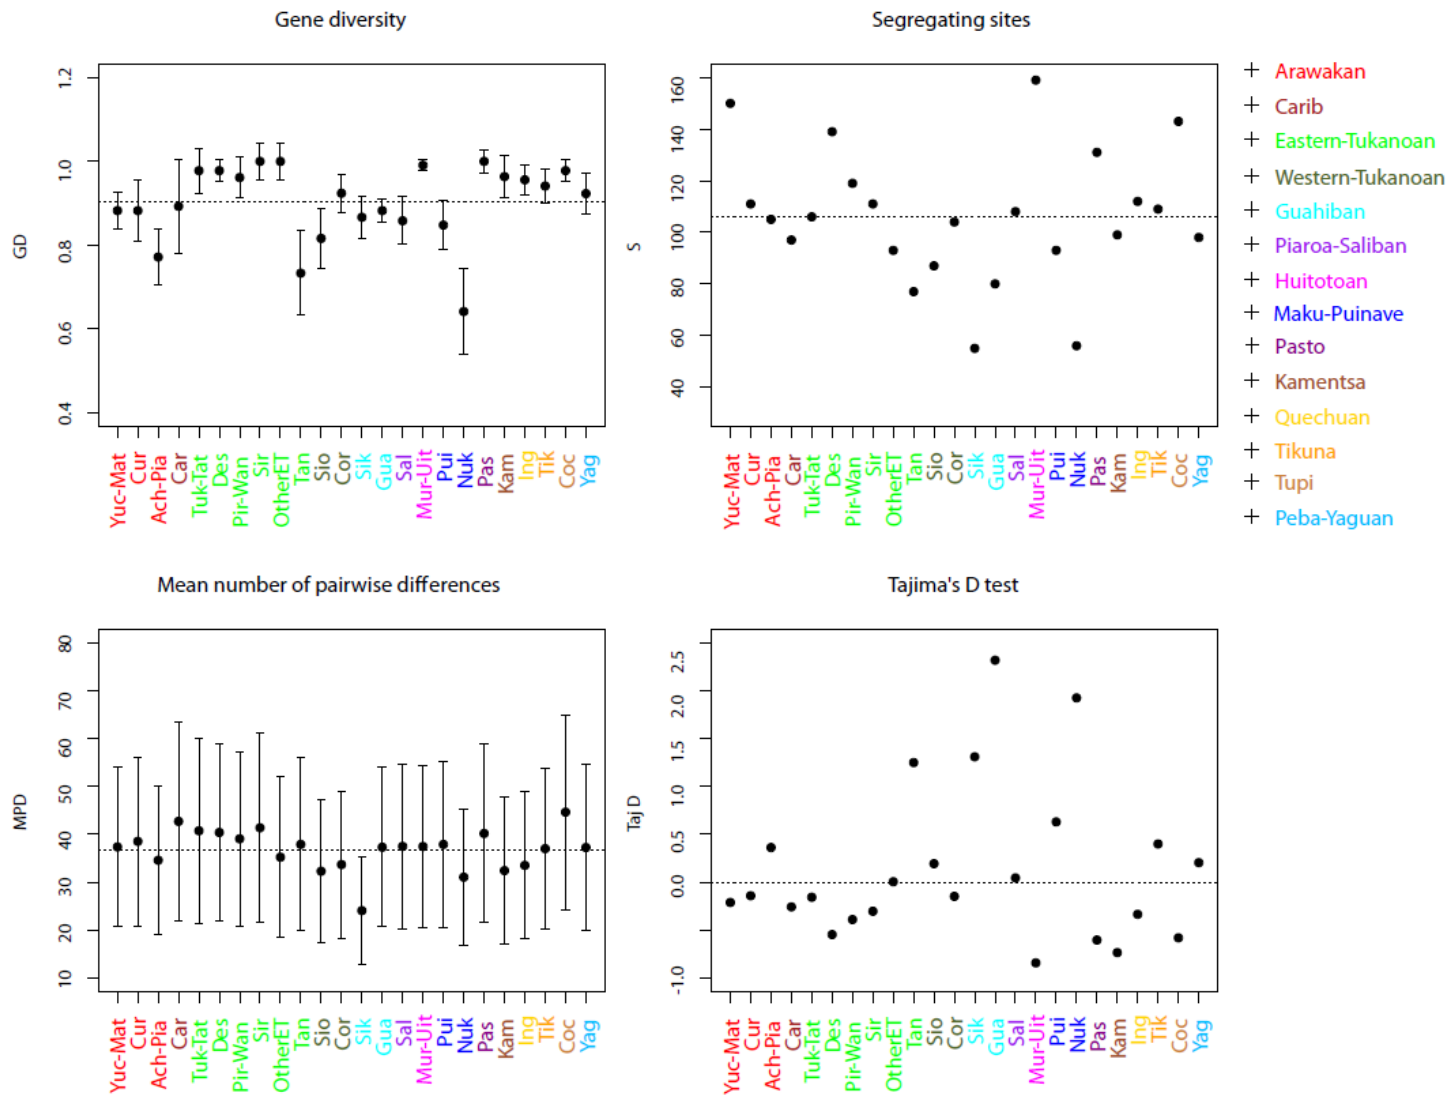

892

893 **Figure 3.** Molecular diversity indices by population. Dashed lines correspond to average values, except for Tajima's D test which corresponds to  
 894 zero. Populations are color-coded by linguistic affiliation as in Figure 2.

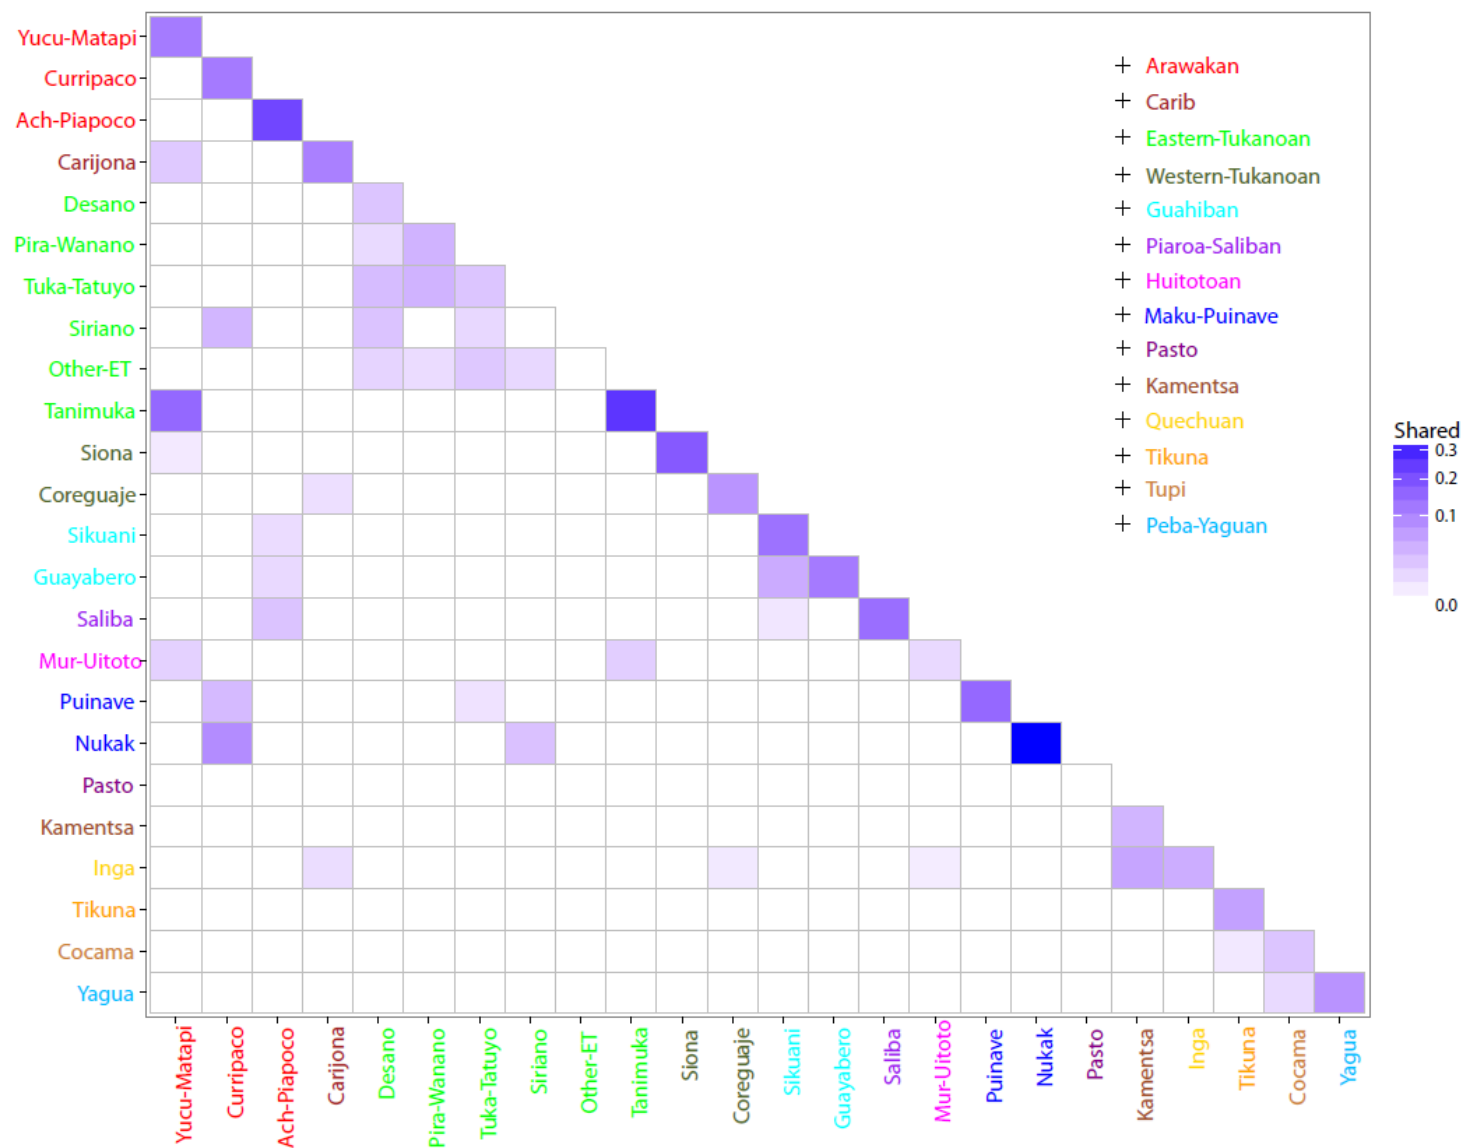

895

896 **Figure 4.** Matrix of shared haplotypes between populations. The color scale indicates the proportion of the total haplotypes that are shared within  
 897 (on the diagonal) or between (below the diagonal) populations.

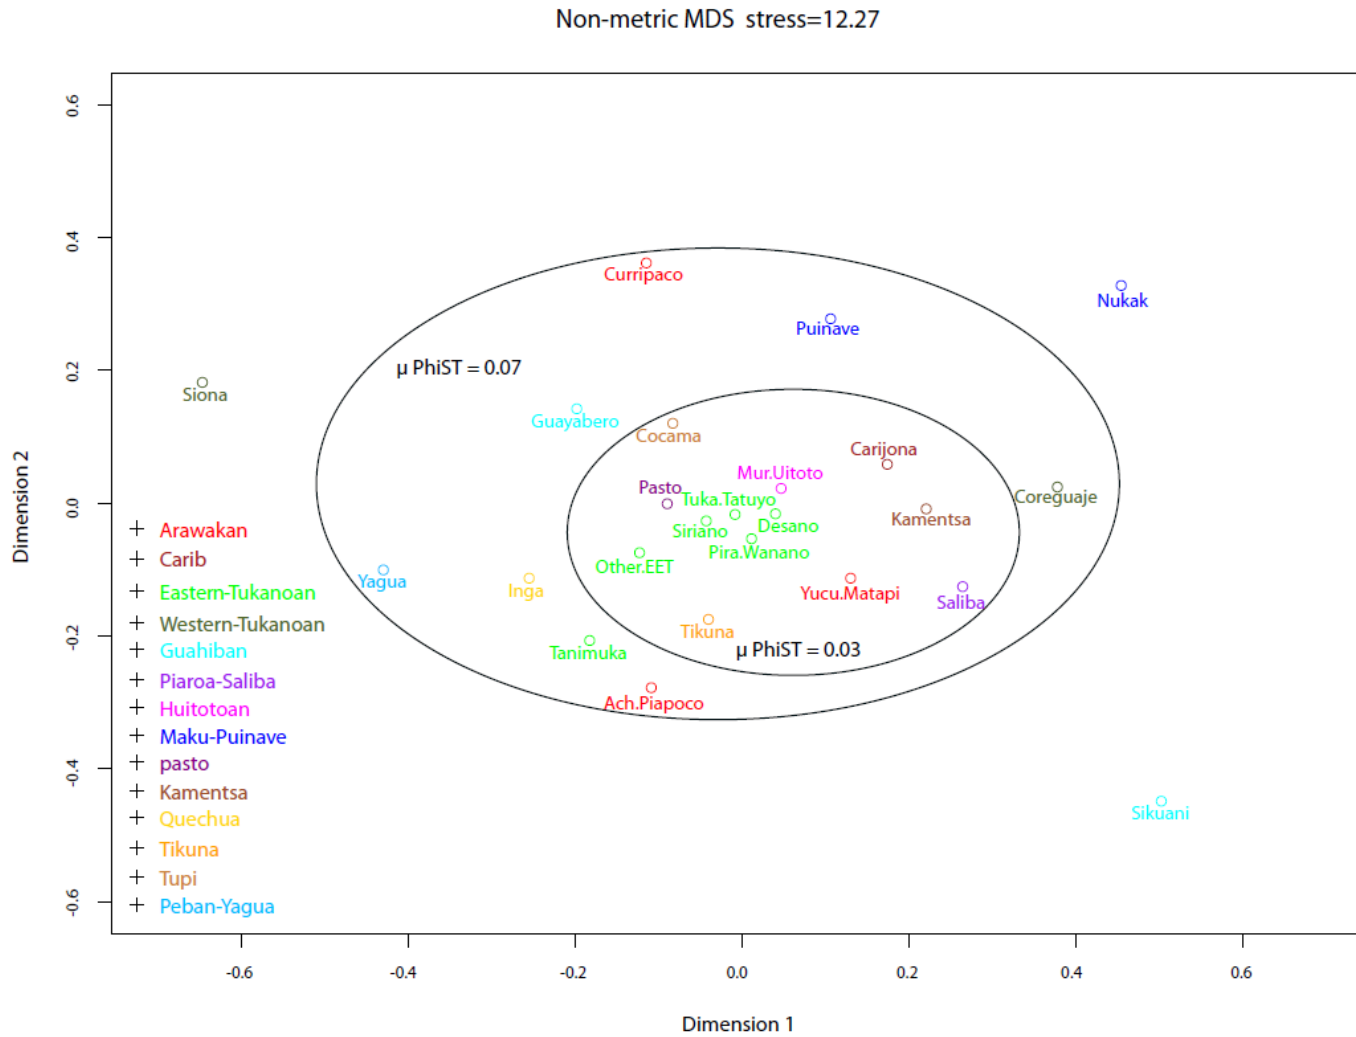

898

899 **Figure 5.** Multidimensional Scaling plot based on  $\Phi_{ST}$  genetic distances. Stress value is given in percentage. The inner circle indicates populations  
 900 with low genetic differentiation and the outer circle indicates populations with moderate differentiation.  $\mu$  PhiST is the average pairwise  $\Phi_{ST}$  value  
 901 within each circle.

**Table 1.** Sampled ethnolinguistic groups with information on merged groups (see Material & Methods: Data Analysis) given below the compound names.

| Population       | Label in figure 1 | N  | Census Sizea | Language family  | Subsistence Strategyb | River/place of residence |
|------------------|-------------------|----|--------------|------------------|-----------------------|--------------------------|
| Yucu-Matapi      |                   | 39 |              | Arawakan         | AG                    | Mirití-Paraná            |
| Yucuna           | 4                 | 31 | 550          | Arawakan         | AG                    | Mirití-Paraná            |
| Matapi           | 2                 | 8  | 220          | Arawakan         | AG                    | Mirití-Paraná            |
| Curripaco        |                   | 17 |              | Arawakan         | AG                    | Atabapo                  |
| Curripaco        | 1                 | 16 | 7827         | Arawakan         | AG                    | Atabapo                  |
| Bare             | 1                 | 1  | NAC          | Arawakan         | AG                    | Atabapo                  |
| Ach-Piapoco      |                   | 24 |              | Arawakan         | AG                    | Meta                     |
| Achagua          | 3                 | 6  | 283          | Arawakan         | AG                    | Meta                     |
| Piapoco          | 3                 | 18 | 4926         | Arawakan         | AG                    | Meta                     |
| <i>Cabiyarid</i> |                   | 1  | 311          | Arawakan         | AG                    | Mirití-Paraná            |
| Carijona         | 5                 | 8  | 307          | Carib            | AG                    | Upper-Vaupés             |
| <i>Cofan</i>     |                   | 6  | 877          | Cofan            | AG                    | Guamúez                  |
| <i>Barasano</i>  |                   | 4  | 2008         | Eastern Tukanoan | AG                    | Upper-Vaupés             |
| Desano           | 6                 | 17 | 2457         | Eastern Tukanoan | AG                    | Upper-Vaupés             |
| <i>Kubeo</i>     |                   | 5  | 6647         | Eastern Tukanoan | AG                    | Upper-Vaupés             |
| Other-EET        |                   | 10 |              | Eastern Tukanoan | AG                    | Upper-Vaupés             |
| Tuyuca           | 11                | 7  | 642          | Eastern Tukanoan | AG                    | Upper-Vaupés             |
| Yuruti           | 6                 | 1  | 687          | Eastern Tukanoan | AG                    | Upper-Vaupés             |
| Pisamira         | 6                 | 1  | 61           | Eastern Tukanoan | AG                    | Upper-Vaupés             |
| Karapana         | 6                 | 1  | 464          | Eastern Tukanoan | AG                    | Upper-Vaupés             |
| Pira-Wanano      |                   | 13 |              | Eastern Tukanoan | AG                    | Upper-Vaupés             |
| Piratapuyo       | 7                 | 8  | 697          | Eastern Tukanoan | AG                    | Upper-Vaupés             |
| Wanano           | 7                 | 5  | 1395         | Eastern Tukanoan | AG                    | Upper-Vaupés             |
| Siriano          | 8                 | 10 | 749          | Eastern Tukanoan | AG                    | Upper-Vaupés             |
| Tanimuka         | 9                 | 10 | 1247         | Eastern Tukanoan | AG                    | Mirití-Paraná            |
| Tuka-Tatuyo      |                   | 10 |              | Eastern Tukanoan | AG                    | Upper-Vaupés             |
| Tukano           | 10                | 8  | 6996         | Eastern Tukanoan | AG                    | Upper-Vaupés             |
| Tatuyo           | 11                | 2  | 331          | Eastern Tukanoan | AG                    | Upper-Vaupés             |
| Siona            | 13                | 17 | 734          | Western Tukanoan | AG                    | Putumayo                 |
| Coreguaje        | 12                | 19 | 2212         | Western Tukanoan | AG                    | Caquetá                  |
| Sikuani          | 15                | 16 | 23006        | Guahiban         | HGP                   | Guaviare                 |
| Guayabero        | 14                | 35 | 1118         | Guahiban         | HGP                   | Guaviare                 |
| Saliba           | 23                | 16 | 1929         | Piaroa-Saliban   | AG                    | Meta                     |
| Mur-Uitotoe      |                   | 26 | 7343         | Huitotoan        | AG                    | Putumayo                 |
| Murui            | 16                | 18 |              | Huitotoan        | AG                    | Putumayo                 |
| Uitoto           | 17                | 8  |              | Huitotoan        | AG                    | Putumayo                 |
| Puinave          | 20                | 19 | 6604         | Maku-Puinave     | HGP                   | Inirida                  |
| Nukak            | 19                | 16 | 1483         | Maku-Puinave     | HGP                   | Interfluvial             |
| Pasto            | 21                | 14 | 69789        | Pasto            | AG                    | Andean                   |

|                  |    |     |        |             |    |          |
|------------------|----|-----|--------|-------------|----|----------|
| Kamentsa         | 18 | 11  | 4773   | Kamentsa    | AG | Andean   |
| Inga             | 24 | 17  | 19079  | Quechuan    | AG | Andean   |
| Tikuna           | 25 | 18  | 7102   | Tikuna      | AG | Amazonas |
| Cocama           | 26 | 17  | 792    | Tupi        | AG | Amazonas |
| Yagua            | 22 | 13  | 297    | Peba-Yaguan | AG | Amazonas |
| <i>Guambiano</i> |    | 1   | 23462  | Barbacoan   | AG | Andean   |
| <i>Nasa</i>      |    | 1   | 138501 | Nasa        | AG | Andean   |
| <i>Mestizo</i>   |    | 9   | NA     | Mestizo     | NA | NA       |
| Total            |    | 439 |        |             |    |          |

a. Data from: (Arango and Sánchez 2004). b. AG: agriculturalist; HGP: Hunter-gatherer populations, data from D-PLACE (Kirby et al 2016).and HG (<https://huntergatherer.la.utexas.edu/home>, accessed on 06.06.2017). d. Populations with label in italics were not considered in the population-based analyses. e. Census data reports the population size including groups that speak five dialectal varieties.

**Table 2.** Frequency of haplogroups for the 24 NWA ethnolinguistic groups included in the population analyses

| Population  | N  | A2   | B2   | C1   | D1   |
|-------------|----|------|------|------|------|
| Yucu-Matapi | 39 | 0.28 | 0.10 | 0.56 | 0.05 |
| Curripaco   | 17 | 0.18 | 0.53 | 0.24 | 0.06 |
| Ach-Piapoco | 24 | 0.54 | 0.04 | 0.42 | 0.00 |
| Carijona    | 8  | 0.13 | 0.25 | 0.63 | 0.00 |
| Desano      | 17 | 0.29 | 0.12 | 0.41 | 0.18 |
| Other-ET    | 10 | 0.50 | 0.00 | 0.30 | 0.20 |
| Pira-Wanano | 13 | 0.31 | 0.08 | 0.38 | 0.23 |
| Siriano     | 10 | 0.40 | 0.10 | 0.40 | 0.10 |
| Tanimuka    | 10 | 0.50 | 0.10 | 0.40 | 0.00 |
| Tuka-Tatuyo | 10 | 0.30 | 0.10 | 0.30 | 0.30 |
| Siona       | 17 | 0.59 | 0.35 | 0.00 | 0.06 |
| Coreguaje   | 19 | 0.11 | 0.16 | 0.74 | 0.00 |
| Sikuani     | 16 | 0.25 | 0.00 | 0.75 | 0.00 |
| Guayabero   | 35 | 0.43 | 0.23 | 0.34 | 0.00 |
| Saliba      | 16 | 0.19 | 0.06 | 0.56 | 0.19 |
| Mur-Uitoto  | 26 | 0.23 | 0.12 | 0.31 | 0.35 |
| Puinave     | 19 | 0.11 | 0.42 | 0.47 | 0.00 |
| Nukak       | 16 | 0.00 | 0.31 | 0.69 | 0.00 |
| Pasto       | 14 | 0.36 | 0.14 | 0.21 | 0.29 |
| Kamentsa    | 11 | 0.18 | 0.09 | 0.64 | 0.09 |
| Inga        | 17 | 0.59 | 0.06 | 0.29 | 0.06 |
| Tikuna      | 18 | 0.44 | 0.00 | 0.44 | 0.11 |
| Cocama      | 17 | 0.29 | 0.35 | 0.29 | 0.06 |
| Yagua       | 13 | 0.62 | 0.15 | 0.23 | 0.00 |

**Table 3.** Shared haplotypes in a worldwide sample of complete mitochondrial sequences sampled at the population level

| Geographic region   | #Sequences | #Haplotypes | %Unique haplotypes | Shared Within population | Shared Between populations | Source                      |
|---------------------|------------|-------------|--------------------|--------------------------|----------------------------|-----------------------------|
| NW Amazonia         | 412        | 216         | 0.676              | 0.241                    | 0.144                      | Present study               |
| Burkina Faso        | 335        | 332         | 0.991              | 0.006                    | 0.003                      | (Barbieri et al. 2012)      |
| SW Zambia           | 169        | 146         | 0.897              | 0.048                    | 0.055                      | (Barbieri et al. 2013)      |
| Botswana/Namibia    | 218        | 128         | 0.75               | 0.188                    | 0.133                      | (Barbieri et al. 2014)      |
| Philippines         | 365        | 233         | 0.734              | 0.227                    | 0.077                      | (Delfin et al. 2014)        |
| Sumatra             | 72         | 48          | 0.771              | 0.229                    | 0.021                      | (Gunnarsdottir et al. 2011) |
| Taiwan              | 549        | 299         | 0.669              | 0.308                    | 0.084                      | (Ko et al. 2014)            |
| Oceania             | 1331       | 650         | 0.689              | 0.277                    | 0.106                      | (Duggan et al. 2014)        |
| Siberia             | 525        | 244         | 0.574              | 0.336                    | 0.217                      | (Duggan et al. 2013)        |
| Mexico <sup>a</sup> | 113        | 90          | 0.867              | 0.133                    | 0                          | (Mizuno et al. 2014)        |

Note: The proportions do not sum up to 1 since some haplotypes are shared both within and between populations. a. The individuals from Mexico are all of Amerindian origin.



**Table 4.** Analysis of molecular variance (AMOVA)

|                        | # groups | Among groups | Within groups | Within populations | Global FST |
|------------------------|----------|--------------|---------------|--------------------|------------|
| One group              | 1        |              | 11.12**       | 88.88              | 0.1112     |
| Language <sup>a</sup>  | 14       | -1.33        | 12.37**       | 88.96**            | 0.1104     |
| Geography <sup>b</sup> | 6        | 1.04         | 10.24**       | 88.72**            | 0.1128     |
| Rivers <sup>c</sup>    | 11       | 5.42**       | 5.99**        | 88.59**            | 0.1141     |

\*\* Significant at 0.01 level

<sup>a</sup>. 1.Arawak: Yucu-Matapi, Curripaco, Ach-Piapoco; 2.Carib: Carijona; 3.Eastern-Tukanoan: Desano, Pira-Wanano, Siriano, Tuka-Tatuyo, Other-ET, Tanimuka; 4.Western-Tukanoan: Coreguaje, Siona; 5.Guahiban: Sikuani, Guayabero; 6.Huitoto: Mur-Uitoto; 7.Maku-Puinave: Puinave, Nukak; 8.Kamentsa; 9.Pasto; 10.Piaroa-Saliba: Saliba; 11.Peba-Yaguan: Yagua; 12.Quechua: Inga; 13.Tikuna; 14.Tupi: Cocama.

<sup>b</sup>. 1. Saliba, Ach-Piapoco; 2. Sikuani, Guayabero, Nukak, Desano, Pira-Wanano, Siriano, Tuka-Tatuyo, Other-ET, Carijona; 3. Coreguaje, Siona, Mur-Uitoto, Inga, Kamentsa, Pasto; 4. Curripaco, Puinave; 5. Yucu-Matapi, Tanimuka; 6. Cocama, Tikuna, Yagua.

<sup>c</sup>. 1.Meta: Saliba, Ach-Piapoco; 2.Vaupés: Desano, Pira-Wanano, Siriano, Tuka-Tatuyo, Other-ET, Carijona; 3.Guaviare: Guayabero, Sikuani; 4.Interfluve: Nukak; 5.Atabapo-Inirida: Curripaco, Puinave; 6.High-Putumayo: Inga, Kamentsa, Pasto; 7.Middle-Putumayo: Siona; 8. Lower-Putumayo: Mur-Uitoto; 9. Middle-Caqueta: Coreguaje; 10.Mirití-Parana: Yucu-Matapi, Tanimuka; 11.Amazon: Cocama, Tikuna, Yagua.

**Table 5.** Multiple regression analysis on distance matrices

|                     |                         | gen.dist all populations  |       |          |       |
|---------------------|-------------------------|---------------------------|-------|----------|-------|
|                     |                         | Reg.coefficient           | P-val | R.square | P-val |
| Simple regression   | geo.dist                | $3.28 \times 10^{-8}$     | 0.444 | 0.009    | 0.444 |
| Multiple regression | geo.dist                | $9.64 \times 10^{-10}$    | 0.983 | 0.036    | 0.126 |
|                     | rivers.dist             | $5.71 \times 10^{-2}$     | 0.011 |          |       |
|                     |                         | gen.dist without outliers |       |          |       |
| Simple regression   | geo.dist.no.outliers    | $6.70 \times 10^{-8}$     | 0.026 | 0.067    | 0.026 |
| Multiple regression | geo.dist.no.outliers    | $5.76 \times 10^{-8}$     | 0.112 | 0.070    | 0.040 |
|                     | rivers.dist.no.outliers | $1.38 \times 10^{-2}$     | 0.458 |          |       |

**Supporting information Table S1.** Molecular diversity indices by population

| Population  | N  | No.hap | S   | GD   | GD.SD | ND     | ND.SD  | MPD   | MPD.SD | TajD   | Pval  |
|-------------|----|--------|-----|------|-------|--------|--------|-------|--------|--------|-------|
| Yucu-Matapi | 39 | 19     | 150 | 0.88 | 0.045 | 0.0023 | 0.0011 | 37.38 | 16.61  | -0.211 | 0.440 |
| Curripaco   | 17 | 11     | 111 | 0.88 | 0.072 | 0.0023 | 0.0012 | 38.54 | 17.64  | -0.141 | 0.456 |
| Ach-Piapoco | 24 | 8      | 105 | 0.77 | 0.065 | 0.0021 | 0.0011 | 34.60 | 15.62  | 0.363  | 0.719 |
| Carijona    | 8  | 6      | 97  | 0.89 | 0.111 | 0.0026 | 0.0014 | 42.71 | 20.80  | -0.257 | 0.405 |
| Tuka-Tatuyo | 10 | 9      | 106 | 0.98 | 0.054 | 0.0025 | 0.0013 | 40.76 | 19.37  | -0.156 | 0.467 |
| Desano      | 17 | 14     | 139 | 0.98 | 0.027 | 0.0024 | 0.0012 | 40.40 | 18.47  | -0.546 | 0.322 |
| Pira-Wanano | 13 | 11     | 119 | 0.96 | 0.050 | 0.0024 | 0.0012 | 39.08 | 18.18  | -0.389 | 0.368 |
| Siriano     | 10 | 10     | 111 | 1.00 | 0.045 | 0.0025 | 0.0013 | 41.38 | 19.66  | -0.303 | 0.388 |
| Other.ET    | 10 | 10     | 93  | 1.00 | 0.045 | 0.0021 | 0.0011 | 35.24 | 16.80  | 0.006  | 0.533 |
| Tanimuka    | 10 | 4      | 77  | 0.73 | 0.101 | 0.0023 | 0.0012 | 37.91 | 18.04  | 1.250  | 0.928 |
| Siona       | 17 | 8      | 87  | 0.82 | 0.071 | 0.0020 | 0.0010 | 32.31 | 14.84  | 0.194  | 0.613 |
| Coreguaje   | 19 | 12     | 104 | 0.92 | 0.046 | 0.0020 | 0.0010 | 33.70 | 15.37  | -0.147 | 0.508 |
| Sikuani     | 16 | 7      | 55  | 0.87 | 0.050 | 0.0015 | 0.0008 | 24.08 | 11.18  | 1.310  | 0.941 |
| Guayabero   | 35 | 11     | 80  | 0.88 | 0.028 | 0.0023 | 0.0011 | 37.31 | 16.62  | 2.318  | 0.992 |
| Saliba      | 16 | 7      | 108 | 0.86 | 0.057 | 0.0023 | 0.0012 | 37.49 | 17.22  | 0.046  | 0.577 |
| Mur-Uitoto  | 26 | 23     | 159 | 0.99 | 0.013 | 0.0023 | 0.0011 | 37.46 | 16.84  | -0.841 | 0.207 |
| Puinave     | 19 | 9      | 93  | 0.85 | 0.059 | 0.0023 | 0.0012 | 37.89 | 17.25  | 0.630  | 0.788 |
| Nukak       | 16 | 4      | 56  | 0.64 | 0.103 | 0.0019 | 0.0010 | 31.07 | 14.33  | 1.925  | 0.989 |
| Pasto       | 14 | 14     | 131 | 1.00 | 0.027 | 0.0024 | 0.0013 | 40.19 | 18.59  | -0.603 | 0.281 |
| Kamentsa    | 11 | 9      | 99  | 0.96 | 0.051 | 0.0020 | 0.0010 | 32.44 | 15.35  | -0.735 | 0.227 |
| Inga        | 17 | 13     | 112 | 0.96 | 0.037 | 0.0020 | 0.0010 | 33.53 | 15.38  | -0.334 | 0.427 |
| Tikuna      | 18 | 13     | 109 | 0.94 | 0.042 | 0.0022 | 0.0011 | 37.02 | 16.90  | 0.399  | 0.722 |
| Cocama      | 17 | 14     | 143 | 0.98 | 0.027 | 0.0027 | 0.0014 | 44.64 | 20.37  | -0.580 | 0.274 |
| Yagua       | 13 | 8      | 98  | 0.92 | 0.050 | 0.0023 | 0.0012 | 37.26 | 17.35  | 0.205  | 0.646 |

No.hap: Number of haplotypes; S: Segregating sites; GD: Gene diversity; GD.SD: GD standard deviation; ND: Nucleotide diversity; ND.SD: ND standard deviation; MPD: Mean number of pairwise differences; MPD.SD: MPD standard deviation; TajD: Tajima's D values; Pval: P values of Tajima's D.
